# Supplementary material for: Characterization of proliferation, differentiation potential, and gene expression among clonal cultures of human dental pulp cells
Source: PubMed Central journal article supplement (PMC7324427; doi:10.1007/s13577-020-00327-9), 2020-03-16
Supplement: 13577_2020_327_MOESM1_ESM.pdf [file 13577_2020_327_MOESM1_ESM.pdf]

Supplemental Table S1. Length of culture (days) and population doubling level (PDL) at growth cessation for each clone (CL).

| clone | culture period (days) | PDL at growth cessation |
|-------|-----------------------|-------------------------|
| CL 1  | 207                   | 48.1                    |
| CL 2  | 207                   | 55.9                    |
| CL 3  | 175                   | 44.7                    |
| CL 4  | 207                   | 56.7                    |
| CL 5  | 207                   | 48.7                    |
| CL 6  | 175                   | 46.7                    |
| CL 7  | 175                   | 38.1                    |
| CL 8  | 207                   | 58.7                    |
| CL 9  | 235                   | 49.1                    |
| CL 10 | 235                   | 57.1                    |
| CL 11 | 235                   | 45.1                    |
| CL 12 | 175                   | 37.1                    |
| CL 13 | 175                   | 30.1                    |
| CL 14 | 235                   | 50.7                    |
| CL 15 | 175                   | 38.7                    |
| CL 16 | 207                   | 33.1                    |
| CL 17 | 175                   | 40.1                    |
| CL 18 | 175                   | 49.7                    |
| CL 19 | 175                   | 47.7                    |
| CL 20 | 207                   | 44.7                    |
| CL 21 | 255                   | 67.3                    |
| CL 22 | 206                   | 44.1                    |
| CL 23 | 207                   | 53.9                    |
| CL 24 | 207                   | 48.1                    |
| CL 25 | 206                   | 43.7                    |
| CL 26 | 255                   | 52.1                    |
| CL 27 | 207                   | 33.1                    |
| CL 28 | 207                   | 35.1                    |
| CL 29 | 207                   | 55.7                    |
| CL 30 | 207                   | 35.1                    |
| CL 31 | 207                   | 47.7                    |
| CL 32 | 255                   | 52.1                    |
| CL 33 | 207                   | 43.7                    |
| CL 34 | 207                   | 49.7                    |
| CL 35 | 207                   | 46.9                    |
| CL 36 | 207                   | 49.3                    |
| CL 37 | 207                   | 41.1                    |
| CL 38 | 207                   | 53.7                    |
| CL 39 | 207                   | 41.1                    |
| CL 40 | 207                   | 46.1                    |
| CL 41 | 207                   | 34.1                    |
| CL 42 | 255                   | 48.7                    |
| CL 43 | 207                   | 49.1                    |
| CL 44 | 207                   | 33.3                    |
| CL 45 | 207                   | 42.7                    |
| CL 46 | 207                   | 38.1                    |
| CL 47 | 207                   | 57.0                    |
| CL 48 | 207                   | 43.1                    |
| CL 49 | 207                   | 51.3                    |
| CL 50 | 207                   | 50.7                    |

**characterization of proliferation, differentiation potential, and gene expression among clonal cultures of human dental pulp cells**

Tomoko Kobayashi<sup>1,2</sup>, Daisuke Torii<sup>3</sup>, Takanori Iwata<sup>2</sup>, Yuichi Izumi<sup>2,4</sup>, Masanori Nasu<sup>1</sup>, Takeo W. Tsutsui<sup>3</sup>

<sup>1</sup> Research Center for Odontology, School of Life Dentistry at Tokyo, The Nippon Dental University

<sup>2</sup> Department of Periodontology, Graduate School of Medical and Dental Sciences, Tokyo Medical and Dental University (TMDU)

<sup>3</sup> Department of Pharmacology, School of Life Dentistry at Tokyo, The Nippon Dental University

<sup>4</sup> Oral Care Perio Center, Southern TOHOKU General Hospital, Southern TOHOKU Research Institute for Neuroscience

*Corresponding author:* Takeo W. Tsutsui (ryuryu@tky.ndu.ac.jp)
