# Supplementary material for: Characterization of proliferation, differentiation potential, and gene expression among clonal cultures of human dental pulp cells
Source: PubMed Central journal article supplement (PMC7324427; doi:10.1007/s13577-020-00327-9), 2020-03-16
Supplement: 13577_2020_327_MOESM2_ESM.pdf [file 13577_2020_327_MOESM2_ESM.pdf]

## characterization of proliferation, differentiation potential, and gene expression among clonal cultures of human dental pulp cells

Tomoko Kobayashi<sup>1,2</sup>, Daisuke Torii<sup>3</sup>, Takanori Iwata<sup>2</sup>, Yuichi Izumi<sup>2,4</sup>, Masanori Nasu<sup>1</sup>, Takeo W. Tsutsui<sup>3</sup>

1 Research Center for Odontology, School of Life Dentistry at Tokyo, The Nippon Dental University

2 Department of Periodontology, Graduate School of Medical and Dental Sciences, Tokyo Medical and Dental University (TMDU)

3 Department of Pharmacology, School of Life Dentistry at Tokyo, The Nippon Dental University

4 Oral Care Perio Center, Southern TOHOKU General Hospital, Southern TOHOKU Research Institute for Neuroscience

Corresponding author: Takeo W. Tsutsui (ryuryu@tky.ndu.ac.jp)

### Supplemental Table S2. Probeset list of gene groups related to ‘stemness or differentiation’.

Genes were extracted from gene databases [Ingenuity Pathway Analysis (IPA) and Gene Ontology] and published scientific literature, then converted to probeset IDs.

| Affymetrix_ProbeSet_ID | Gene_Symbol | Gene_Description                                            |
|------------------------|-------------|-------------------------------------------------------------|
| 7896952                | ATAD3A      | ATPase family, AAA domain containing 3A                     |
| 7897068                | SKI         | v-ski sarcoma viral oncogene homolog (avian)                |
| 7897132                | PRDM16      | PR domain containing 16                                     |
| 7897280                | HES3        | hairy and enhancer of split 3 (Drosophila)                  |
| 7897737                | C1orf187    | chromosome 1 open reading frame 187                         |
| 7898537                | PAX7        | paired box 7                                                |
| 7898693                | ALPL        | alkaline phosphatase, liver/bone/kidney                     |
| 7898739                | CDC42       | “cell division cycle 42 (GTP binding protein, 25kDa)”       |
| 7898799                | C1QC        | “complement component 1, q subcomponent, C chain”           |
| 7898988                | CLIC4       | chloride intracellular channel 4                            |
| 7899167                | LIN28A      | lin-28 homolog A (C. elegans)                               |
| 7899187                | HMGN2       | high-mobility group nucleosomal binding domain 2            |
| 7899265                | SFN         | stratifin                                                   |
| 7899562                | PTPRU       | “protein tyrosine phosphatase, receptor type, U”            |
| 7899753                | LCK         | lymphocyte-specific protein tyrosine kinase                 |
| 7899774                | HDAC1       | histone deacetylase 1                                       |
| 7899790                | TSSK3       | testis-specific serine kinase 3                             |
| 7900146                | ZC3H12A     | zinc finger CCCH-type containing 12A                        |
| 7900340                | BMP8A       | bone morphogenetic protein 8a                               |
| 7900699                | CDC20       | cell division cycle 20 homolog (S. cerevisiae)              |
| 7900792                | PTPRF       | protein tyrosine phosphatase, receptor type, F              |
| 7901073                | UROD        | uroporphyrinogen decarboxylase                              |
| 7901123                | NASP        | nuclear autoantigenic sperm protein (histone-binding)       |
| 7901140                | MAST2       | microtubule associated serine/threonine kinase 2            |
| 7901363                | CDKN2C      | “cyclin-dependent kinase inhibitor 2C (p18, inhibits CDK4)” |
| 7901557                | DMRTB1      | “DMRT-like family B with proline-rich C-terminal, 1”        |

7901696 PCSK9 proprotein convertase subtilisin/kexin type 9  
7901913 FOXD3 forkhead box D3  
7902227 GADD45A growth arrest and DNA-damage-inducible, alpha  
7902367 ACADM acyl-CoA dehydrogenase, C-4 to C-12 straight chain  
7903358 VCAM1 vascular cell adhesion molecule 1  
7903461 NTNG1 netrin G1  
7903786 CSF1 colony stimulating factor 1 (macrophage)  
7903878 RBM15 RNA binding motif protein 15  
7904025 WNT2B "wingless-type MMTV integration site family, member 2B "  
7904702 NOTCH2NL Notch homolog 2 (Drosophila) N-terminal like  
7904726 TXNIP thioredoxin interacting protein  
7905220 ECM1 extracellular matrix protein 1  
7905395 PSMB4 proteasome (prosome, macropain) subunit, beta type, 4  
7905544 SPRR1A small proline-rich protein 1A  
7905789 IL6R interleukin 6 receptor  
7905854 ZBTB7B zinc finger and BTB domain containing 7B  
7905938 RAG1AP1 recombination activating gene 1 activating protein 1  
7906061 SYT11 synaptotagmin XI  
7906107 SEMA4A "sema domain, immunoglobulin domain (Ig), transmembrane domain (TM) and short cytoplasmic domain, (semaphorin) 4A "  
7906140 BGLAP bone gamma-carboxyglutamate (gla) protein  
7906244 NTRK1 "neurotrophic tyrosine kinase, receptor, type 1 "  
7906400 IFI16 "interferon, gamma-inducible protein 16 "  
7906954 PBX1 pre-B-cell leukemia homeobox 1  
7907160 ATP1B1 ATPase, Na<sup>+</sup>/K<sup>+</sup> transporting, beta 1 polypeptide  
7907702 SOAT1 sterol O-acyltransferase 1  
7908409 RGS2 "regulator of G-protein signaling 2, 24kDa "  
7908694 NAV1 neuron navigator 1  
7908917 BTG2 "BTG family, member 2 "  
7909027 NFASC neurofascin  
7909225 DYRK3 dual-specificity tyrosine-(Y)-phosphorylation regulated kinase 3  
7909332 CD55 CD55 molecule, decay accelerating factor for complement (Cromer blood group)  
7909628 FLVCR1 feline leukemia virus subgroup C cellular receptor 1  
7909708 CENPF "centromere protein F, 350/400ka (mitosis) "  
7909789 TGFB2 "transforming growth factor, beta 2 "  
7909890 HLX H2.0-like homeobox  
7910134 MIXL1 Mix1 homeobox-like 1 (Xenopus laevis)  
7910146 PSEN2 presenilin 2 (Alzheimer disease 4)  
7910217 WNT3A "wingless-type MMTV integration site family, member 3A "  
7910265 OBSCN "obscurin, cytoskeletal calmodulin and titin-interacting RhoGEF "  
7910550 TSNAX translin-associated factor X  
7910694 EDARADD EDAR-associated death domain  
7911376 HES4 hairy and enhancer of split 4 (Drosophila)  
7911422 SDF4 stromal cell derived factor 4

|                 |                                                                                    |
|-----------------|------------------------------------------------------------------------------------|
| 7911506 DVL1    | dishevelled, dsh homolog 1 (Drosophila)                                            |
| 7911750 HES5    | hairy and enhancer of split 5 (Drosophila)                                         |
| 7911989 RPL22   | ribosomal protein L22                                                              |
| 7912012 ACOT7   | acyl-CoA thioesterase 7                                                            |
| 7912157 ERRF1   | ERBB receptor feedback inhibitor 1                                                 |
| 7912481 MAD2L2  | MAD2 mitotic arrest deficient-like 2 (yeast)                                       |
| 7912706 EPHA2   | EPH receptor A2                                                                    |
| 7913450 HSPG2   | heparan sulfate proteoglycan 2                                                     |
| 7913547 WNT4    | "wingless-type MMTV integration site family, member 4 "                            |
| 7913655 ID3     | "inhibitor of DNA binding 3, dominant negative helix-loop-helix protein "          |
| 7913858 PAQR7   | progesterone and adiponectin receptor family member VII                            |
| 7913864 STMN1   | stathmin 1                                                                         |
| 7913869 STMN1   | stathmin 1                                                                         |
| 7914021 SLC9A1  | "solute carrier family 9 (sodium/hydrogen exchanger), member 1 "                   |
| 7914433 BAI2    | brain-specific angiogenesis inhibitor 2                                            |
| 7915156 POU3F1  | POU class 3 homeobox 1                                                             |
| 7915252 BMP8B   | bone morphogenetic protein 8b                                                      |
| 7915614 PTCH2   | patched 2                                                                          |
| 7915955 SPATA6  | spermatogenesis associated 6                                                       |
| 7915991 DMRTA2  | DMRT-like family A2                                                                |
| 7916112 RAB3B   | RAB3B, member RAS oncogene family                                                  |
| 7916185 ZCCHC11 | "zinc finger, CCHC domain containing 11 "                                          |
| 7916541 DAB1    | disabled homolog 1 (Drosophila)                                                    |
| 7916562 HNRNPA1 | heterogeneous nuclear ribonucleoprotein A1                                         |
| 7916609 JUN     | jun oncogene                                                                       |
| 7916669 DOCK7   | dedicator of cytokinesis 7                                                         |
| 7917182 ELTD1   | EGF, latrophilin and seven transmembrane domain containing 1                       |
| 7917199 TTLL7   | "tubulin tyrosine ligase-like family, member 7 "                                   |
| 7917532 GBP2    | guanylate binding protein 2, interferon-inducible                                  |
| 7917599 BARHL2  | BarH-like homeobox 2                                                               |
| 7917649 TGFBR3  | "transforming growth factor, beta receptor III "                                   |
| 7917676 GLMN    | "glomulin, FKBP associated protein "                                               |
| 7918323 SORT1   | sortilin 1                                                                         |
| 7918359 AMIGO1  | adhesion molecule with Ig-like domain 1                                            |
| 7918813 NRAS    | neuroblastoma RAS viral (v-ras) oncogene homolog                                   |
| 7918857 TSPAN2  | tetraspanin 2                                                                      |
| 7918869 NGF     | nerve growth factor (beta polypeptide)                                             |
| 7919095 NOTCH2  | Notch homolog 2 (Drosophila)                                                       |
| 7919751 MCL1    | myeloid cell leukemia sequence 1 (BCL2-related)                                    |
| 7919815 CTSK    | cathepsin K                                                                        |
| 7919825 ARNT    | aryl hydrocarbon receptor nuclear translocator                                     |
| 7919898 SEMA6C  | "sema domain, transmembrane domain (TM), and cytoplasmic domain, (semaphorin) 6C " |
| 7920165 FLG     | filaggrin                                                                          |

|         |          |                                                                                       |
|---------|----------|---------------------------------------------------------------------------------------|
| 7920217 | SPRR2G   | small proline-rich protein 2G                                                         |
| 7920472 | TPM3     | tropomyosin 3                                                                         |
| 7920575 | PBXIP1   | pre-B-cell leukemia homeobox interacting protein 1                                    |
| 7920839 | RIT1     | Ras-like without CAAX 1                                                               |
| 7920984 | CCT3     | chaperonin containing TCP1, subunit 3 (gamma)                                         |
| 7921014 | MEF2D    | myocyte enhancer factor 2D                                                            |
| 7921099 | CRABP2   | cellular retinoic acid binding protein 2                                              |
| 7921133 | HDGF     | hepatoma-derived growth factor                                                        |
| 7921144 | SH2D2A   | SH2 domain containing 2A                                                              |
| 7921538 | IGSF8    | immunoglobulin superfamily, member 8                                                  |
| 7921936 | LMX1A    | "LIM homeobox transcription factor 1, alpha "                                         |
| 7922432 | RC3H1    | ring finger and CCCH-type zinc finger domains 1                                       |
| 7922976 | PTGS2    | prostaglandin-endoperoxide synthase 2 (prostaglandin G/H synthase and cyclooxygenase) |
| 7923027 | GLRX2    | glutaredoxin 2                                                                        |
| 7923086 | ASPM     | "asp (abnormal spindle) homolog, microcephaly associated (Drosophila) "               |
| 7923528 | MYOG     | myogenin (myogenic factor 4)                                                          |
| 7924029 | LAMB3    | "laminin, beta 3 "                                                                    |
| 7924058 | IRF6     | interferon regulatory factor 6                                                        |
| 7924832 | WNT9A    | wingless-type MMTV integration site family, member 9A                                 |
| 7924996 | C1orf198 | chromosome 1 open reading frame 198                                                   |
| 7925565 | HNRNPU   | heterogeneous nuclear ribonucleoprotein U (scaffold attachment factor A)              |
| 7926105 | GATA3    | GATA binding protein 3                                                                |
| 7926319 | SUV39H2  | suppressor of variegation 3-9 homolog 2 (Drosophila)                                  |
| 7926368 | VIM      | vimentin                                                                              |
| 7926609 | BMI1     | BMI1 polycomb ring finger oncogene                                                    |
| 7926851 | WAC      | WW domain containing adaptor with coiled-coil                                         |
| 7926916 | ZEB1     | zinc finger E-box binding homeobox 1                                                  |
| 7927389 | MAPK8    | mitogen-activated protein kinase 8                                                    |
| 7927631 | DKK1     | dickkopf homolog 1 (Xenopus laevis)                                                   |
| 7927710 | CDK1     | cyclin-dependent kinase 1                                                             |
| 7927814 | SIRT1    | sirtuin (silent mating type information regulation 2 homolog) 1 (S. cerevisiae)       |
| 7927955 | KIAA1279 | KIAA1279                                                                              |
| 7927964 | SRGN     | serglycin                                                                             |
| 7928069 | COL13A1  | "collagen, type XIII, alpha 1 "                                                       |
| 7928308 | DDIT4    | DNA-damage-inducible transcript 4                                                     |
| 7928855 | BMPRI1A  | "bone morphogenetic protein receptor, type IA "                                       |
| 7928937 | MINPP1   | multiple inositol-polyphosphate phosphatase 1                                         |
| 7929026 | ACTA2    | actin, alpha 2, smooth muscle, aorta                                                  |
| 7929282 | HEX      | hematopoietically expressed homeobox                                                  |
| 7929334 | CEP55    | centrosomal protein 55kDa                                                             |
| 7929744 | NKX2-3   | "NK2 transcription factor related, locus 3 (Drosophila) "                             |
| 7929816 | SCD      | stearoyl-CoA desaturase (delta-9-desaturase)                                          |
| 7929840 | PAX2     | paired box 2                                                                          |

7929882 SEMA4G "sema domain, immunoglobulin domain (Ig), transmembrane domain (TM) and short cytoplasmic domain, (semaphorin) 4G "  
7929932 KAZALD1 Kazal-type serine peptidase inhibitor domain 1  
7929947 TLX1 T-cell leukemia homeobox 1  
7929988 HPS6 Hermansky-Pudlak syndrome 6  
7930074 NFKB2 nuclear factor of kappa light polypeptide gene enhancer in B-cells 2 (p49/p100)  
7930208 INA "internexin neuronal intermediate filament protein, alpha "  
7930537 TCF7L2 "transcription factor 7-like 2 (T-cell specific, HMG-box) "  
7930627 ADRB1 "adrenergic, beta-1-, receptor "  
7931181 HMX3 H6 family homeobox 3  
7931184 HMX2 H6 family homeobox 2  
7931553 UTF1 undifferentiated embryonic cell transcription factor 1  
7931810 KLF6 Kruppel-like factor 6  
7932186 DCLRE1C "DNA cross-link repair 1C (PSO2 homolog, S. cerevisiae) "  
7932254 ITGA8 "integrin, alpha 8 "  
7932390 TRDMT1 tRNA aspartic acid methyltransferase 1  
7932938 EPC1 enhancer of polycomb homolog 1 (Drosophila)  
7932966 ITGB1 "integrin, beta 1 (fibronectin receptor, beta polypeptide, antigen CD29 includes MDF2, MSK12) "  
7932985 NRP1 neuropilin 1  
7933194 CXCL12 chemokine (C-X-C motif) ligand 12  
7933366 GDF2 growth differentiation factor 2  
7933372 GDF10 growth differentiation factor 10  
7933469 ARHGAP22 Rho GTPase activating protein 22  
7934083 NEUROG3 neurogenin 3  
7934215 SPOCK2 "sparc/osteonectin, cwcv and kazal-like domains proteoglycan (testican) 2 "  
7934570 KCNMA1 "potassium large conductance calcium-activated channel, subfamily M, alpha member 1 "  
7934906 ACTA2 actin, alpha 2, smooth muscle, aorta  
7935027 IDE insulin-degrading enzyme  
7935146 NOC3L nucleolar complex associated 3 homolog (S. cerevisiae)  
7935361 SLIT1 slit homolog 1 (Drosophila)  
7935528 SFRP5 secreted frizzled-related protein 5  
7935707 CHUK conserved helix-loop-helix ubiquitous kinase  
7935776 SCD stearyl-CoA desaturase (delta-9-desaturase)  
7935855 LBX1 ladybird homeobox 1  
7935892 FGF8 fibroblast growth factor 8 (androgen-induced)  
7935968 LDB1 LIM domain binding 1  
7935990 PSD pleckstrin and Sec7 domain containing  
7936661 PRDX3 peroxiredoxin 3  
7936734 FGFR2 fibroblast growth factor receptor 2  
7936882 NKX1-2 NK1 homeobox 2  
7936904 CTBP2 C-terminal binding protein 2  
7937020 MKI67 antigen identified by monoclonal antibody Ki-67  
7937079 BNIP3 BCL2/adenovirus E1B 19kDa interacting protein 3  
7937335 IFITM1 interferon induced transmembrane protein 1 (9-27)

|                 |                                                                         |
|-----------------|-------------------------------------------------------------------------|
| 7937508 CD151   | CD151 molecule (Raph blood group)                                       |
| 7937667 BRSK2   | BR serine/threonine kinase 2                                            |
| 7937772 IGF2    | insulin-like growth factor 2 (somatomedin A)                            |
| 7938154 ILK     | integrin-linked kinase                                                  |
| 7938422 CTR9    | Ctr9, Paf1/RNA polymerase II complex component, homolog (S. cerevisiae) |
| 7938880 HTATIP2 | "HIV-1 Tat interactive protein 2, 30kDa "                               |
| 7939197 HIPK3   | homeodomain interacting protein kinase 3                                |
| 7939341 CD44    | CD44 molecule (Indian blood group)                                      |
| 7939524 EXT2    | exostosin 2                                                             |
| 7939642 CREB3L1 | cAMP responsive element binding protein 3-like 1                        |
| 7939665 MDK     | midkine (neurite growth-promoting factor 2)                             |
| 7939751 NR1H3   | "nuclear receptor subfamily 1, group H, member 3 "                      |
| 7940530 C11orf9 | chromosome 11 open reading frame 9                                      |
| 7940798 MARK2   | MAP/microtubule affinity-regulating kinase 2                            |
| 7940989 ESRRA   | estrogen-related receptor alpha                                         |
| 7941457 CCDC85B | coiled-coil domain containing 85B                                       |
| 7941478 SART1   | squamous cell carcinoma antigen recognized by T cells                   |
| 7941917 CABP4   | calcium binding protein 4                                               |
| 7942123 CCND1   | cyclin D1                                                               |
| 7942964 TMEM135 | transmembrane protein 135                                               |
| 7943620 ATM     | ataxia telangiectasia mutated                                           |
| 7943892 NCAM1   | neural cell adhesion molecule 1                                         |
| 7943984 ZBTB16  | zinc finger and BTB domain containing 16                                |
| 7944341 UPK2    | uroplakin 2                                                             |
| 7944435 HINFP   | histone H4 transcription factor                                         |
| 7944493 CBL     | Cas-Br-M (murine) ecotropic retroviral transforming sequence            |
| 7944537 POU2F3  | POU class 2 homeobox 3                                                  |
| 7944882 ROBO3   | "roundabout, axon guidance receptor, homolog 3 (Drosophila) "           |
| 7945014 CHEK1   | CHK1 checkpoint homolog (S. pombe)                                      |
| 7945162 BARX2   | BARX homeobox 2                                                         |
| 7945436 HRAS    | v-Ha-ras Harvey rat sarcoma viral oncogene homolog                      |
| 7945730 ASCL2   | achaete-scute complex homolog 2 (Drosophila)                            |
| 7946610 EIF4G2  | eukaryotic translation initiation factor 4 gamma, 2                     |
| 7946661 DKK3    | dickkopf homolog 3 (Xenopus laevis)                                     |
| 7946749 CALCA   | calcitonin-related polypeptide alpha                                    |
| 7946757 SOX6    | SRY (sex determining region Y)-box 6                                    |
| 7947015 TSG101  | tumor susceptibility gene 101                                           |
| 7947199 LGR4    | leucine-rich repeat-containing G protein-coupled receptor 4             |
| 7947230 BDNF    | brain-derived neurotrophic factor                                       |
| 7947363 WT1     | Wilms tumor 1                                                           |
| 7947540 TRAF6   | TNF receptor-associated factor 6                                        |
| 7947652 AMBRA1  | autophagy/beclin-1 regulator 1                                          |
| 7947694 CKAP5   | cytoskeleton associated protein 5                                       |

|                |                                                                           |
|----------------|---------------------------------------------------------------------------|
| 7947861 SPI1   | spleen focus forming virus (SFFV) proviral integration oncogene spi1      |
| 7948420 FABP5  | fatty acid binding protein 5 (psoriasis-associated)                       |
| 7948476 PRPF19 | PRP19/PSO4 pre-mRNA processing factor 19 homolog ( <i>S. cerevisiae</i> ) |
| 7948612 FADS1  | fatty acid desaturase 1                                                   |
| 7949067 BAD    | BCL2-associated agonist of cell death                                     |
| 7949206 MEN1   | multiple endocrine neoplasia I                                            |
| 7949364 CDCA5  | cell division cycle associated 5                                          |
| 7949465 RELA   | v-rel reticuloendotheliosis viral oncogene homolog A (avian)              |
| 7949532 FOSL1  | FOS-like antigen 1                                                        |
| 7949754 CLCF1  | cardiotrophin-like cytokine factor 1                                      |
| 7950012 CCND1  | cyclin D1                                                                 |
| 7950023 FGF19  | fibroblast growth factor 19                                               |
| 7950032 FGF4   | fibroblast growth factor 4                                                |
| 7950036 FGF3   | fibroblast growth factor 3                                                |
| 7950067 DHCR7  | 7-dehydrocholesterol reductase                                            |
| 7950136 PHOX2A | paired-like homeobox 2a                                                   |
| 7950307 UCP2   | uncoupling protein 2 (mitochondrial, proton carrier)                      |
| 7950321 UCP3   | uncoupling protein 3 (mitochondrial, proton carrier)                      |
| 7950534 WNT11  | wingless-type MMTV integration site family, member 11                     |
| 7950671 GAB2   | GRB2-associated binding protein 2                                         |
| 7951046 MRE11A | MRE11 meiotic recombination 11 homolog A ( <i>S. cerevisiae</i> )         |
| 7951807 CADM1  | cell adhesion molecule 1                                                  |
| 7952205 MCAM   | melanoma cell adhesion molecule                                           |
| 7952268 THY1   | Thy-1 cell surface antigen                                                |
| 7952305 BMPR1A | "bone morphogenetic protein receptor, type IA "                           |
| 7952325 HSPA8  | heat shock 70kDa protein 8                                                |
| 7952453 ROBO4  | "roundabout homolog 4, magic roundabout ( <i>Drosophila</i> ) "           |
| 7952601 ETS1   | v-ets erythroblastosis virus E26 oncogene homolog 1 (avian)               |
| 7953012 WNT5B  | "wingless-type MMTV integration site family, member 5B "                  |
| 7953100 FKBP4  | "FK506 binding protein 4, 59kDa "                                         |
| 7953135 TULP3  | tubby like protein 3                                                      |
| 7953200 CCND2  | cyclin D2                                                                 |
| 7953284 NTF3   | neurotrophin 3                                                            |
| 7953291 CD9    | CD9 molecule                                                              |
| 7953333 CD27   | CD27 molecule                                                             |
| 7953547 ATN1   | atrophin 1                                                                |
| 7953603 C1S    | "complement component 1, s subcomponent "                                 |
| 7953651 PEX5   | peroxisomal biogenesis factor 5                                           |
| 7953981 ETV6   | ets variant 6                                                             |
| 7954006 PTMA   | prothymosin, alpha                                                        |
| 7954029 CDKN1B | cyclin-dependent kinase inhibitor 1B (p27, Kip1)                          |
| 7954055 APOLD1 | apolipoprotein L domain containing 1                                      |
| 7954090 EMP1   | epithelial membrane protein 1                                             |

|         |          |                                                                         |
|---------|----------|-------------------------------------------------------------------------|
| 7954196 | MGST1    | microsomal glutathione S-transferase 1                                  |
| 7955063 | TMEM106C | transmembrane protein 106C                                              |
| 7955112 | H1FNT    | "H1 histone family, member N, testis-specific "                         |
| 7955170 | WNT1     | "wingless-type MMTV integration site family, member 1 "                 |
| 7955348 | GPD1     | glycerol-3-phosphate dehydrogenase 1 (soluble)                          |
| 7955535 | ACVR1B   | "activin A receptor, type IB "                                          |
| 7955702 | SOAT2    | sterol O-acyltransferase 2                                              |
| 7955787 | SP1      | Sp1 transcription factor                                                |
| 7955890 | HNRNPA1  | heterogeneous nuclear ribonucleoprotein A1                              |
| 7956026 | GDF11    | growth differentiation factor 11                                        |
| 7956038 | MMP19    | matrix metalloproteinase 19                                             |
| 7956076 | CDK2     | cyclin-dependent kinase 2                                               |
| 7956120 | ERBB3    | v-erb-b2 erythroblastic leukemia viral oncogene homolog 3 (avian)       |
| 7956287 | NAB2     | NGFI-A binding protein 2 (EGR1 binding protein 2)                       |
| 7956910 | CAND1    | cullin-associated and neddylation-dissociated 1                         |
| 7958051 | ASCL1    | achaete-scute complex homolog 1 (Drosophila)                            |
| 7958620 | IFT81    | intraflagellar transport 81 homolog (Chlamydomonas)                     |
| 7958749 | SH2B3    | SH2B adaptor protein 3                                                  |
| 7958931 | DTX1     | deltex homolog 1 (Drosophila)                                           |
| 7959786 | AACS     | acetoacetyl-CoA synthetase                                              |
| 7959957 | ULK1     | unc-51-like kinase 1 (C. elegans)                                       |
| 7960340 | FOXM1    | forkhead box M1                                                         |
| 7960397 | FGF23    | fibroblast growth factor 23                                             |
| 7960518 | TNFRSF1A | tumor necrosis factor receptor superfamily, member 1A                   |
| 7960850 | SLC2A14  | "solute carrier family 2 (facilitated glucose transporter), member 14 " |
| 7960865 | SLC2A3   | solute carrier family 2 (facilitated glucose transporter), member 3     |
| 7960933 | M6PR     | mannose-6-phosphate receptor (cation dependent)                         |
| 7961022 | PTMA     | prothymosin, alpha                                                      |
| 7961798 | SOX5     | SRY (sex determining region Y)-box 5                                    |
| 7961865 | KRAS     | v-Ki-ras2 Kirsten rat sarcoma viral oncogene homolog                    |
| 7961891 | BHLHE41  | "basic helix-loop-helix family, member e41 "                            |
| 7962000 | PTH1H    | parathyroid hormone-like hormone                                        |
| 7962579 | AMIGO2   | adhesion molecule with Ig-like domain 2                                 |
| 7962659 | HDAC7    | histone deacetylase 7                                                   |
| 7962689 | VDR      | vitamin D (1,25-dihydroxyvitamin D3) receptor                           |
| 7962703 | COL2A1   | "collagen, type II, alpha 1 "                                           |
| 7962831 | CCNT1    | cyclin T1                                                               |
| 7962918 | WNT10B   | "wingless-type MMTV integration site family, member 10B "               |
| 7963020 | DHH      | desert hedgehog homolog (Drosophila)                                    |
| 7963157 | RACGAP1  | Rac GTPase activating protein 1                                         |
| 7963375 | KRT84    | keratin 84                                                              |
| 7963421 | KRT6A    | keratin 6A                                                              |
| 7963523 | KRT3     | keratin 3                                                               |

|         |          |                                                                                                          |
|---------|----------|----------------------------------------------------------------------------------------------------------|
| 7963534 | KRT4     | keratin 4                                                                                                |
| 7963664 | SP7      | Sp7 transcription factor                                                                                 |
| 7963880 | ITGA7    | integrin, alpha 7                                                                                        |
| 7963946 | MMP19    | matrix metalloproteinase 19                                                                              |
| 7964522 | CDK4     | cyclin-dependent kinase 4                                                                                |
| 7965090 | CSRP2    | cysteine and glycine-rich protein 2                                                                      |
| 7965322 | KITLG    | KIT ligand                                                                                               |
| 7965335 | DUSP6    | dual specificity phosphatase 6                                                                           |
| 7965359 | ATP2B1   | ATPase, Ca <sup>++</sup> transporting, plasma membrane 1                                                 |
| 7965423 | BTG1     | "B-cell translocation gene 1, anti-proliferative "                                                       |
| 7965812 | GNPTAB   | "N-acetylglucosamine-1-phosphate transferase, alpha and beta subunits "                                  |
| 7966189 | FOXN4    | forkhead box N4                                                                                          |
| 7966631 | LHX5     | LIM homeobox 5                                                                                           |
| 7966668 | TBX5     | T-box 5                                                                                                  |
| 7966690 | TBX3     | T-box 3                                                                                                  |
| 7966749 | TESC     | tescalcin                                                                                                |
| 7966878 | CIT      | "citron (rho-interacting, serine/threonine kinase 21) "                                                  |
| 7967039 | MSI1     | musashi homolog 1 (Drosophila)                                                                           |
| 7967175 | KDM2B    | lysine (K)-specific demethylase 2B                                                                       |
| 7967230 | DIABLO   | diablo homolog (Drosophila)                                                                              |
| 7967685 | STX2     | syntaxin 2                                                                                               |
| 7968015 | TNFRSF19 | tumor necrosis factor receptor superfamily, member 19                                                    |
| 7968199 | CDK8     | cyclin-dependent kinase 8                                                                                |
| 7968260 | GSX1     | GS homeobox 1                                                                                            |
| 7968265 | PDX1     | pancreatic and duodenal homeobox 1                                                                       |
| 7968274 | PAN3     | PAN3 poly(A) specific ribonuclease subunit homolog (S. cerevisiae)                                       |
| 7969017 | RB1      | retinoblastoma 1                                                                                         |
| 7969271 | SUGT1    | SGT1, suppressor of G2 allele of SKP1 (S. cerevisiae)                                                    |
| 7969830 | ZIC2     | "Zic family member 2 (odd-paired homolog, Drosophila) "                                                  |
| 7970317 | TFDP1    | transcription factor Dp-1                                                                                |
| 7970347 | CDC16    | cell division cycle 16 homolog (S. cerevisiae)                                                           |
| 7970727 | CDX2     | caudal type homeobox 2                                                                                   |
| 7970763 | FLT1     | fms-related tyrosine kinase 1 (vascular endothelial growth factor/vascular permeability factor receptor) |
| 7970954 | DCLK1    | doublecortin-like kinase 1                                                                               |
| 7971015 | SMAD9    | SMAD family member 9                                                                                     |
| 7971177 | FOXO1    | forkhead box O1                                                                                          |
| 7972069 | MYCBP2   | MYC binding protein 2                                                                                    |
| 7972157 | EDNRB    | endothelin receptor type B                                                                               |
| 7972217 | SPRY2    | sprouty homolog 2 (Drosophila)                                                                           |
| 7972336 | DZIP1    | DAZ interacting protein 1                                                                                |
| 7972567 | ZIC5     | "Zic family member 5 (odd-paired homolog, Drosophila) "                                                  |
| 7972713 | EFNB2    | ephrin-B2                                                                                                |
| 7972737 | LIG4     | "ligase IV, DNA, ATP-dependent "                                                                         |

7973067 PNP purine nucleoside phosphorylase  
 7973084 ANG "angiogenin, ribonuclease, RNase A family, 5 "  
 7973336 MMP14 matrix metalloproteinase 14 (membrane-inserted)  
 7973371 ACIN1 apoptotic chromatin condensation inducer 1  
 7973530 PCK2 phosphoenolpyruvate carboxykinase 2 (mitochondrial)  
 7973709 NFATC4 "nuclear factor of activated T-cells, cytoplasmic, calcineurin-dependent 4 "  
 7973743 BNIP3 BCL2/adenovirus E1B 19kDa interacting protein 3  
 7973745 FOXG1 forkhead box G1  
 7973974 PAX9 paired box 9  
 7974404 CDKN3 cyclin-dependent kinase inhibitor 3  
 7974461 LGALS3 "lectin, galactoside-binding, soluble, 3 "  
 7974799 MNAT1 menage a trois homolog 1, cyclin H assembly factor (*Xenopus laevis*)  
 7974851 HIF1A "hypoxia inducible factor 1, alpha subunit (basic helix-loop-helix transcription factor) "  
 7975545 PSEN1 presenilin 1  
 7975595 C14orf169 chromosome 14 open reading frame 169  
 7975602 ACOT2 acyl-CoA thioesterase 2  
 7975696 VSX2 visual system homeobox 2  
 7975779 FOS FBJ murine osteosarcoma viral oncogene homolog  
 7976012 NRXN3 neurexin 3  
 7976128 TTC8 tetratricopeptide repeat domain 8  
 7976567 BDKRB1 bradykinin receptor B1  
 7976783 DLK1 delta-like 1 homolog (*Drosophila*)  
 7976863 PPP2R5C protein phosphatase 2, regulatory subunit B', gamma  
 7977046 TNFAIP2 "tumor necrosis factor, alpha-induced protein 2 "  
 7977511 TEP1 telomerase-associated protein 1  
 7977621 NDRG2 NDRG family member 2  
 7977657 HNRNPC heterogeneous nuclear ribonucleoprotein C (C1/C2)  
 7977906 ACIN1 apoptotic chromatin condensation inducer 1  
 7977928 CEBPE "CCAAT/enhancer binding protein (C/EBP), epsilon "  
 7978222 TGM1 "transglutaminase 1 (K polypeptide epidermal type I, protein-glutamine-gamma-glutamyltransferase) "  
 7978407 PRKD1 protein kinase D1  
 7978644 NFKBIA "nuclear factor of kappa light polypeptide gene enhancer in B-cells inhibitor, alpha "  
 7978706 FOXA1 forkhead box A1  
 7979179 ERO1L ERO1-like (*S. cerevisiae*)  
 7979241 BMP4 bone morphogenetic protein 4  
 7979307 DLGAP5 discs, large (*Drosophila*) homolog-associated protein 5  
 7979357 OTX2 orthodenticle homeobox 2  
 7979505 SIX1 SIX homeobox 1  
 7979510 SIX4 SIX homeobox 4  
 7979824 ACTN1 actinin, alpha 1  
 7980005 NUMB numb homolog (*Drosophila*)  
 7980098 ALDH6A1 "aldehyde dehydrogenase 6 family, member A1 "  
 7980233 PGF placental growth factor

7980316 TGFB3 "transforming growth factor, beta 3 "  
 7981111 DICER1 "dicer 1, ribonuclease type III "  
 7981242 BCL11B B-cell CLL/lymphoma 11B (zinc finger protein)  
 7981494 AKT1 v-akt murine thymoma viral oncogene homolog 1  
 7981538 JAG2 jagged 2  
 7981824 CYFIP1 cytoplasmic FMR1 interacting protein 1  
 7981917 C15orf2 chromosome 15 open reading frame 2  
 7982204 HMG2 high-mobility group nucleosomal binding domain 2  
 7982597 THBS1 thrombospondin 1  
 7982792 RAD51 RAD51 homolog (RecA homolog, E. coli) (S. cerevisiae)  
 7982854 DLL4 delta-like 4 (Drosophila)  
 7983502 PLDN pallidin homolog (mouse)  
 7983527 SEMA6D "sema domain, transmembrane domain (TM), and cytoplasmic domain, (semaphorin) 6D "  
 7983606 EID1 EP300 interacting inhibitor of differentiation 1  
 7983630 FGF7 fibroblast growth factor 7  
 7983969 CCNB2 cyclin B2  
 7984319 MAP2K1 mitogen-activated protein kinase kinase 1  
 7984364 SMAD3 SMAD family member 3  
 7984524 PAQR5 progesterin and adipoQ receptor family member V  
 7984686 BBS4 Bardet-Biedl syndrome 4  
 7984743 CD276 CD276 molecule  
 7984779 PML promyelocytic leukemia  
 7985080 ISL2 ISL LIM homeobox 2  
 7985577 ZSCAN2 zinc finger and SCAN domain containing 2  
 7985786 ACAN aggrecan  
 7985934 SEMA4B "sema domain, immunoglobulin domain (Ig), transmembrane domain (TM) and short cytoplasmic domain, (semaphorin) 4B "  
 7985983 NGRN "neugrin, neurite outgrowth associated "  
 7986068 BLM "Bloom syndrome, RecQ helicase-like "  
 7986160 UNC45A unc-45 homolog A (C. elegans)  
 7986359 IGF1R insulin-like growth factor 1 receptor  
 7986383 IGF1R insulin-like growth factor 1 receptor  
 7986411 MEF2A myocyte enhancer factor 2A  
 7987315 ACTC1 actin, alpha, cardiac muscle 1  
 7987405 RASGRP1 RAS guanyl releasing protein 1 (calcium and DAG-regulated)  
 7987536 FAM82A2 "family with sequence similarity 82, member A2 "  
 7988031 RPS3A ribosomal protein S3A  
 7988987 ONECUT1 one cut homeobox 1  
 7989023 RAB27A "RAB27A, member RAS oncogene family "  
 7989365 RORA RAR-related orphan receptor A  
 7989985 ITGA11 integrin, alpha 11  
 7990345 SEMA7A "semaphorin 7A, GPI membrane anchor (John Milton Hagen blood group) "  
 7990545 CSPG4 chondroitin sulfate proteoglycan 4  
 7990736 ADAMTS7 ADAM metalloproteinase with thrombospondin type 1 motif, 7

|         |           |                                                                                           |
|---------|-----------|-------------------------------------------------------------------------------------------|
| 7991313 | PLIN1     | perilipin 1                                                                               |
| 7991323 | PEX11A    | peroxisomal biogenesis factor 11 alpha                                                    |
| 7991332 | MESP1     | mesoderm posterior 1 homolog (mouse)                                                      |
| 7991335 | ANPEP     | alanyl (membrane) aminopeptidase                                                          |
| 7992038 | METRN     | "meteorin, glial cell differentiation regulator "                                         |
| 7992409 | RNF151    | ring finger protein 151                                                                   |
| 7992594 | CCNF      | cyclin F                                                                                  |
| 7992789 | TNFRSF12A | "tumor necrosis factor receptor superfamily, member 12A "                                 |
| 7992956 | GLIS2     | GLIS family zinc finger 2                                                                 |
| 7992973 | DNAJA3    | "DnaJ (Hsp40) homolog, subfamily A, member 3 "                                            |
| 7993310 | MKL2      | MKL/myocardin-like 2                                                                      |
| 7993467 | NDE1      | nudE nuclear distribution gene E homolog 1 (A. nidulans)                                  |
| 7994280 | IL4R      | interleukin 4 receptor                                                                    |
| 7994487 | CD19      | CD19 molecule                                                                             |
| 7994939 | RNF40     | ring finger protein 40                                                                    |
| 7995055 | MYST1     | MYST histone acetyltransferase 1                                                          |
| 7995206 | TGFB1I1   | transforming growth factor beta 1 induced transcript 1                                    |
| 7995574 | HNRNPA1   | heterogeneous nuclear ribonucleoprotein A1                                                |
| 7995631 | RBL2      | retinoblastoma-like 2 (p130)                                                              |
| 7995668 | IRX5      | iroquois homeobox 5                                                                       |
| 7995681 | MMP2      | "matrix metalloproteinase 2 (gelatinase A, 72kDa gelatinase, 72kDa type IV collagenase) " |
| 7996219 | NDRG4     | NDRG family member 4                                                                      |
| 7996430 | HSF4      | heat shock transcription factor 4                                                         |
| 7996455 | E2F4      | E2F transcription factor 4, p107/p130-binding                                             |
| 7996647 | PARD6A    | par-6 partitioning defective 6 homolog alpha (C. elegans)                                 |
| 7996785 | PRMT7     | protein arginine methyltransferase 7                                                      |
| 7997352 | WWOX      | WW domain containing oxidoreductase                                                       |
| 7997533 | OSGIN1    | oxidative stress induced growth inhibitor 1                                               |
| 7997726 | FOXF1     | forkhead box F1                                                                           |
| 7997733 | FOXC2     | "forkhead box C2 (MFH-1, mesenchyme forkhead 1) "                                         |
| 7997801 | IL17C     | interleukin 17C                                                                           |
| 7998055 | MC1R      | melanocortin 1 receptor (alpha melanocyte stimulating hormone receptor)                   |
| 7998063 | TUBB3     | tubulin, beta 3                                                                           |
| 7999044 | CREBBP    | CREB binding protein                                                                      |
| 7999423 | SOCS1     | suppressor of cytokine signaling 1                                                        |
| 7999431 | PRM3      | protamine 3                                                                               |
| 8000409 | HMGN2     | high-mobility group nucleosomal binding domain 2                                          |
| 8000567 | IL27      | interleukin 27                                                                            |
| 8001306 | SIAH1     | seven in absentia homolog 1 (Drosophila)                                                  |
| 8001387 | SALL1     | sal-like 1 (Drosophila)                                                                   |
| 8001449 | IRX3      | iroquois homeobox 3                                                                       |
| 8001507 | BBS2      | Bardet-Biedl syndrome 2                                                                   |
| 8001800 | CDH11     | "cadherin 11, type 2, OB-cadherin (osteoblast) "                                          |

8003068 MPHOSPH6 M-phase phosphoprotein 6  
 8003204 GINS2 GINS complex subunit 2 (Psf2 homolog)  
 8003298 SLC7A5 "solute carrier family 7 (cationic amino acid transporter, y+ system), member 5 "  
 8003425 CBFA2T3 "core-binding factor, runt domain, alpha subunit 2; translocated to, 3 "  
 8003758 PAFAH1B1 "platelet-activating factor acetylhydrolase 1b, regulatory subunit 1 (45kDa) "  
 8004309 SLC2A4 "solute carrier family 2 (facilitated glucose transporter), member 4 "  
 8004360 KCTD11 potassium channel tetramerisation domain containing 11  
 8004394 SPEM1 spermatid maturation 1  
 8004408 FGF11 fibroblast growth factor 11  
 8004464 TNFSF12 tumor necrosis factor (ligand) superfamily, member 12  
 8004571 EFN3 ephrin-B3  
 8004784 ALOX15B "arachidonate 15-lipoxygenase, type B "  
 8004867 NDEL1 nudE nuclear distribution gene E homolog (A. nidulans)-like 1  
 8005048 MYOCD myocardin  
 8005576 MAPK7 mitogen-activated protein kinase 7  
 8006239 NF1 neurofibromin 1  
 8006409 CDK5R1 "cyclin-dependent kinase 5, regulatory subunit 1 (p35) "  
 8006531 SLFN5 schlafen family member 5  
 8006638 GGNBP2 gametogenetin binding protein 2  
 8006681 LHX1 LIM homeobox 1  
 8006768 SOCS7 suppressor of cytokine signaling 7  
 8006906 ERBB2 "v-erb-b2 erythroblastic leukemia viral oncogene homolog 2, neuro/glioblastoma derived oncogene homolog (avian) "  
 8006940 GRB7 growth factor receptor-bound protein 7  
 8006999 CSF3 colony stimulating factor 3 (granulocyte)  
 8007008 THRA "thyroid hormone receptor, alpha (erythroblastic leukemia viral (v-erb-a) oncogene homolog, avian) "  
 8007071 CDC6 cell division cycle 6 homolog (S. cerevisiae)  
 8007084 RARA "retinoic acid receptor, alpha "  
 8007212 STAT5A signal transducer and activator of transcription 5A  
 8007637 FZD2 frizzled homolog 2 (Drosophila)  
 8007745 HEXIM1 hexamethylene bis-acetamide inducible 1  
 8007895 WNT9B wingless-type MMTV integration site family, member 9B  
 8007931 ITGB3 "integrin, beta 3 (platelet glycoprotein IIIa, antigen CD61) "  
 8008074 CDK5RAP3 CDK5 regulatory subunit associated protein 3  
 8008151 IGF2BP1 insulin-like growth factor 2 mRNA binding protein 1  
 8008201 NGFR nerve growth factor receptor  
 8008388 SPATA20 spermatogenesis associated 20  
 8008517 NME1 "non-metastatic cells 1, protein (NM23A) expressed in "  
 8008627 NOG noggin  
 8008682 MSI2 musashi homolog 2 (Drosophila)  
 8009096 ACE angiotensin I converting enzyme (peptidyl-dipeptidase A) 1  
 8009227 PSMC5 proteasome (prosome, macropain) 26S subunit, ATPase, 5  
 8009301 PRKCA "protein kinase C, alpha "  
 8009417 KPNA2 karyopherin alpha 2 (RAG cohort 1, importin alpha 1)

|                  |                                                                                  |
|------------------|----------------------------------------------------------------------------------|
| 8009517 SOX9     | SRY (sex determining region Y)-box 9                                             |
| 8010967 NXN      | nucleoredoxin                                                                    |
| 8012257 TP53     | tumor protein p53                                                                |
| 8012403 AURKB    | aurora kinase B                                                                  |
| 8012605 GAS7     | growth arrest-specific 7                                                         |
| 8012896 PMP22    | peripheral myelin protein 22                                                     |
| 8012953 TRIM16   | tripartite motif-containing 16                                                   |
| 8013135 SREBF1   | sterol regulatory element binding transcription factor 1                         |
| 8013788 FLOT2    | flotillin 2                                                                      |
| 8014214 NLE1     | notchless homolog 1 (Drosophila)                                                 |
| 8014841 MED1     | mediator complex subunit 1                                                       |
| 8014865 NEUROD2  | neurogenic differentiation 2                                                     |
| 8014974 TOP2A    | topoisomerase (DNA) II alpha 170kDa                                              |
| 8015366 KRT14    | keratin 14                                                                       |
| 8015590 STAT5B   | signal transducer and activator of transcription 5B                              |
| 8015607 STAT3    | signal transducer and activator of transcription 3 (acute-phase response factor) |
| 8015769 BRCA1    | breast cancer 1, early onset                                                     |
| 8015827 SOST     | sclerostin                                                                       |
| 8015914 HDAC5    | histone deacetylase 5                                                            |
| 8016311 WNT3     | wingless-type MMTV integration site family, member 3                             |
| 8016433 HOXB1    | homeobox B1                                                                      |
| 8016452 HOXB4    | homeobox B4                                                                      |
| 8016578 SLC35B1  | solute carrier family 35, member B1                                              |
| 8016628 PPP1R9B  | "protein phosphatase 1, regulatory (inhibitor) subunit 9B "                      |
| 8016640 HILS1    | "histone linker H1 domain, spermatid-specific 1 "                                |
| 8016646 COL1A1   | "collagen, type I, alpha 1 "                                                     |
| 8016739 TOB1     | "transducer of ERBB2, 1 "                                                        |
| 8016745 SPAG9    | sperm associated antigen 9                                                       |
| 8017150 TUBD1    | "tubulin, delta 1 "                                                              |
| 8017711 GNA13    | "guanine nucleotide binding protein (G protein), alpha 13 "                      |
| 8017718 AXIN2    | axin 2                                                                           |
| 8018258 USH1G    | Usher syndrome 1G (autosomal recessive)                                          |
| 8018264 C17orf28 | chromosome 17 open reading frame 28                                              |
| 8018364 GRB2     | growth factor receptor-bound protein 2                                           |
| 8018579 EVPL     | envoplakin                                                                       |
| 8018646 FOXJ1    | forkhead box J1                                                                  |
| 8018793 JMJD6    | jumonji domain containing 6                                                      |
| 8018864 SOCS3    | suppressor of cytokine signaling 3                                               |
| 8018966 TIMP2    | TIMP metalloproteinase inhibitor 2                                               |
| 8018972 TIMP2    | TIMP metalloproteinase inhibitor 2                                               |
| 8019108 AZI1     | 5-azacytidine induced 1                                                          |
| 8019308 MAFG     | v-maf musculoaponeurotic fibrosarcoma oncogene homolog G (avian)                 |
| 8019367 RFNG     | RFNG O-fucosylpeptide 3-beta-N-acetylglucosaminyltransferase                     |

|         |          |                                                                           |
|---------|----------|---------------------------------------------------------------------------|
| 8019392 | FASN     | fatty acid synthase                                                       |
| 8019737 | KPNA2    | karyopherin alpha 2 (RAG cohort 1, importin alpha 1)                      |
| 8019796 | MAFG     | v-maf musculoaponeurotic fibrosarcoma oncogene homolog G (avian)          |
| 8019798 | MAFG     | v-maf musculoaponeurotic fibrosarcoma oncogene homolog G (avian)          |
| 8020090 | TWSG1    | twisted gastrulation homolog 1 (Drosophila)                               |
| 8020423 | MIB1     | mindbomb homolog 1 (Drosophila)                                           |
| 8020455 | GATA6    | GATA binding protein 6                                                    |
| 8020468 | RBBP8    | retinoblastoma binding protein 8                                          |
| 8021365 | ATP8B1   | ATPase, aminophospholipid transporter, class I, type 8B, member 1         |
| 8021418 | MALT1    | mucosa associated lymphoid tissue lymphoma translocation gene 1           |
| 8021866 | NFATC1   | nuclear factor of activated T-cells, cytoplasmic, calcineurin-dependent 1 |
| 8022424 | NF1      | neurofibromin 1                                                           |
| 8022814 | HNRNPA1  | heterogeneous nuclear ribonucleoprotein A1                                |
| 8023497 | ATP8B1   | ATPase, aminophospholipid transporter, class I, type 8B, member 1         |
| 8023646 | BCL2     | B-cell CLL/lymphoma 2                                                     |
| 8023941 | MADCAM1  | mucosal vascular addressin cell adhesion molecule 1                       |
| 8023948 | C19orf20 | chromosome 19 open reading frame 20                                       |
| 8023968 | CDC34    | cell division cycle 34 homolog (S. cerevisiae)                            |
| 8023990 | FGF22    | fibroblast growth factor 22                                               |
| 8023995 | FSTL3    | follistatin-like 3 (secreted glycoprotein)                                |
| 8024062 | CFD      | complement factor D (adipsin)                                             |
| 8024282 | DAZAP1   | DAZ associated protein 1                                                  |
| 8024429 | AMH      | anti-Mullerian hormone                                                    |
| 8024485 | GADD45B  | "growth arrest and DNA-damage-inducible, beta "                           |
| 8024557 | GNA11    | "guanine nucleotide binding protein (G protein), alpha 11 (Gq class) "    |
| 8024566 | GNA11    | "guanine nucleotide binding protein (G protein), alpha 11 (Gq class) "    |
| 8024728 | ITGB1BP3 | integrin beta 1 binding protein 3                                         |
| 8024754 | CREB3L3  | cAMP responsive element binding protein 3-like 3                          |
| 8025179 | ZNF358   | zinc finger protein 358                                                   |
| 8025278 | RETN     | resistin                                                                  |
| 8025402 | ANGPTL4  | angiopoietin-like 4                                                       |
| 8025601 | ICAM1    | intercellular adhesion molecule 1                                         |
| 8026047 | JUNB     | jun B proto-oncogene                                                      |
| 8026106 | CALR     | calreticulin                                                              |
| 8026214 | NANOS3   | nanos homolog 3 (Drosophila)                                              |
| 8027402 | CCNE1    | cyclin E1                                                                 |
| 8027566 | CEBPG    | "CCAAT/enhancer binding protein (C/EBP), gamma "                          |
| 8027778 | FXVD5    | FXVD domain containing ion transport regulator 5                          |
| 8028162 | TBCB     | tubulin folding cofactor B                                                |
| 8028652 | ZFP36    | "zinc finger protein 36, C3H type, homolog (mouse) "                      |
| 8028719 | DLL3     | delta-like 3 (Drosophila)                                                 |
| 8028872 | LTBP4    | latent transforming growth factor beta binding protein 4                  |
| 8029006 | AXL      | AXL receptor tyrosine kinase                                              |

|         |         |                                                                                          |
|---------|---------|------------------------------------------------------------------------------------------|
| 8029129 | RPS19   | ribosomal protein S19                                                                    |
| 8029465 | BCL3    | B-cell CLL/lymphoma 3                                                                    |
| 8029530 | APOE    | apolipoprotein E                                                                         |
| 8029560 | CLPTM1  | cleft lip and palate associated transmembrane protein 1                                  |
| 8029580 | RELB    | v-rel reticuloendotheliosis viral oncogene homolog B                                     |
| 8029693 | FOSB    | FBJ murine osteosarcoma viral oncogene homolog B                                         |
| 8029754 | FOXA3   | forkhead box A3                                                                          |
| 8030339 | FLT3LG  | fms-related tyrosine kinase 3 ligand                                                     |
| 8030557 | ATF5    | activating transcription factor 5                                                        |
| 8030630 | NR1H2   | "nuclear receptor subfamily 1, group H, member 2 "                                       |
| 8030881 | PPP2R1A | "protein phosphatase 2, regulatory subunit A, alpha "                                    |
| 8031441 | BRSK1   | BR serine/threonine kinase 1                                                             |
| 8032023 | THEG    | Theg homolog (mouse)                                                                     |
| 8032290 | TCF3    | transcription factor 3 (E2A immunoglobulin enhancer binding factors E12/E47)             |
| 8032392 | MKMK2   | MAP kinase interacting serine/threonine kinase 2                                         |
| 8032718 | DAPK3   | death-associated protein kinase 3                                                        |
| 8032755 | ZBTB7A  | zinc finger and BTB domain containing 7A                                                 |
| 8032834 | LRG1    | leucine-rich alpha-2-glycoprotein 1                                                      |
| 8032839 | SEMA6B  | "sema domain, transmembrane domain (TM), and cytoplasmic domain, (semaphorin) 6B "       |
| 8033362 | INSR    | insulin receptor                                                                         |
| 8033892 | ANGPTL6 | angiopoietin-like 6                                                                      |
| 8033912 | DNMT1   | DNA (cytosine-5-)-methyltransferase 1                                                    |
| 8034034 | KEAP1   | kelch-like ECH-associated protein 1                                                      |
| 8034043 | S1PR5   | sphingosine-1-phosphate receptor 5                                                       |
| 8034544 | PRDX2   | peroxiredoxin 2                                                                          |
| 8034565 | DNASE2  | "deoxyribonuclease II, lysosomal "                                                       |
| 8034643 | CACNA1A | "calcium channel, voltage-dependent, P/Q type, alpha 1A subunit "                        |
| 8034772 | ASF1B   | ASF1 anti-silencing function 1 homolog B (S. cerevisiae)                                 |
| 8034940 | NOTCH3  | Notch homolog 3 (Drosophila)                                                             |
| 8035445 | JUND    | jun D proto-oncogene                                                                     |
| 8035847 | ZNF675  | zinc finger protein 675                                                                  |
| 8036004 | CEBPA   | "CCAAT/enhancer binding protein (C/EBP), alpha "                                         |
| 8036133 | UPK1A   | uroplakin 1A                                                                             |
| 8036494 | GGN     | gametogenetin                                                                            |
| 8036749 | EID2    | EP300 interacting inhibitor of differentiation 2                                         |
| 8037005 | TGFB1   | "transforming growth factor, beta 1 "                                                    |
| 8037186 | LIPE    | lipase, hormone-sensitive                                                                |
| 8037537 | ERCC2   | "excision repair cross-complementing rodent repair deficiency, complementation group 2 " |
| 8037732 | NANOS2  | nanos homolog 2 (Drosophila)                                                             |
| 8037775 | PTGIR   | prostaglandin I2 (prostacyclin) receptor (IP)                                            |
| 8037913 | NAPA    | "N-ethylmaleimide-sensitive factor attachment protein, alpha "                           |
| 8037931 | ZNF541  | zinc finger protein 541                                                                  |
| 8039484 | IL11    | interleukin 11                                                                           |

8040070 SOX11 SRY (sex determining region Y)-box 11  
8040103 ID2 "inhibitor of DNA binding 2, dominant negative helix-loop-helix protein "  
8040142 CPSF3 cleavage and polyadenylation specific factor 3, 73kDa  
8040223 RRM2 ribonucleotide reductase M2  
8040456 MSGN1 mesogenin 1  
8040473 RHOB "ras homolog gene family, member B "  
8040479 GDF7 growth differentiation factor 7  
8040578 CENPO centromere protein O  
8040827 TCF23 transcription factor 23  
8040898 TRIM54 tripartite motif-containing 54  
8041236 SPAST spastin  
8041447 CRIM1 cysteine rich transmembrane BMP regulator 1 (chordin-like)  
8041582 PKDCC "protein kinase domain containing, cytoplasmic homolog (mouse) "  
8041781 EPAS1 endothelial PAS domain protein 1  
8041820 SOCS5 suppressor of cytokine signaling 5  
8041867 MSH2 "mutS homolog 2, colon cancer, nonpolyposis type 1 (E. coli) "  
8042439 ANTXR1 anthrax toxin receptor 1  
8042487 GMCL1 germ cell-less homolog 1 (Drosophila)  
8042537 ATP6V1B1 "ATPase, H+ transporting, lysosomal 56/58kDa, V1 subunit B1 "  
8042701 EMX1 empty spiracles homeobox 1  
8042737 ALMS1 Alstrom syndrome 1  
8042925 SEMA4F "sema domain, immunoglobulin domain (Ig), transmembrane domain (TM) and short cytoplasmic domain, (semaphorin) 4F "  
8043114 TCF7L1 "transcription factor 7-like 1 (T-cell specific, HMG-box) "  
8043203 VAMP5 vesicle-associated membrane protein 5 (myobrevin)  
8043244 ATOH8 atonal homolog 8 (Drosophila)  
8043283 KDM3A lysine (K)-specific demethylase 3A  
8043504 MAL "mal, T-cell differentiation protein "  
8044686 ACTR3 ARP3 actin-related protein 3 homolog (yeast)  
8044927 INHBB "inhibin, beta B "  
8044933 GLI2 GLI family zinc finger 2  
8045381 CCNT2 cyclin T2  
8045587 ACVR2A "activin A receptor, type IIA "  
8045816 GPD2 glycerol-3-phosphate dehydrogenase 2 (mitochondrial)  
8046373 DLX1 distal-less homeobox 1  
8046380 ITGA6 "integrin, alpha 6 "  
8046461 ZAK sterile alpha motif and leucine zipper containing kinase AZK  
8046628 RBM45 RNA binding motif protein 45  
8046646 OSBPL6 oxysterol binding protein-like 6  
8046695 ITGA4 "integrin, alpha 4 (antigen CD49D, alpha 4 subunit of VLA-4 receptor) "  
8046861 ITGAV "integrin, alpha V (vitronectin receptor, alpha polypeptide, antigen CD51) "  
8046922 COL3A1 collagen, type III, alpha 1  
8047059 HNRNPC heterogeneous nuclear ribonucleoprotein C (C1/C2)  
8047086 NAB1 NGFI-A binding protein 1 (EGR1 binding protein 1)

8047174 SLC39A10 solute carrier family 39 (zinc transporter), member 10  
8047419 CASP8 "caspase 8, apoptosis-related cysteine peptidase "  
8047487 FZD7 frizzled homolog 7 (Drosophila)  
8047538 BMPR2 "bone morphogenetic protein receptor, type II (serine/threonine kinase) "  
8047738 NRP2 neuropilin 2  
8047839 CREB1 cAMP responsive element binding protein 1  
8048146 XRCC5 X-ray repair complementing defective repair in Chinese hamster cells 5 (double-strand-break rejoining)  
8048340 RQCD1 RCD1 required for cell differentiation1 homolog (S. pombe)  
8048445 WNT6 wingless-type MMTV integration site family, member 6  
8048452 WNT10A wingless-type MMTV integration site family, member 10A  
8048541 DES desmin  
8048551 SPEG SPEG complex locus  
8048847 AGFG1 ArfGAP with FG repeats 1  
8049083 PTMA prothymosin, alpha  
8049487 MLPH melanophilin  
8050190 ADAM17 ADAM metallopeptidase domain 17  
8050215 YWHAQ tyrosine 3-monooxygenase/tryptophan 5-monooxygenase activation protein, theta polypeptide  
8050497 OSR1 odd-skipped related 1 (Drosophila)  
8050763 CENPO centromere protein O  
8051762 SLC8A1 solute carrier family 8 (sodium/calcium exchanger), member 1  
8051949 SIX2 SIX homeobox 2  
8051993 PIGF phosphatidylinositol glycan anchor biosynthesis, class F  
8052149 PSME4 "proteasome (prosome, macropain) activator subunit 4 "  
8052399 BCL11A B-cell CLL/lymphoma 11A (zinc finger protein)  
8052762 GFPT1 glutamine--fructose-6-phosphate transaminase 1  
8053263 SEMA4F "sema domain, immunoglobulin domain (Ig), transmembrane domain (TM) and short cytoplasmic domain, (semaphorin) 4F "  
8053668 EIF2AK3 eukaryotic translation initiation factor 2-alpha kinase 3  
8054004 SEMA4C "sema domain, immunoglobulin domain (Ig), transmembrane domain (TM) and short cytoplasmic domain, (semaphorin) 4C "  
8054377 FHL2 four and a half LIM domains 2  
8054664 ZC3H8 zinc finger CCCH-type containing 8  
8054740 PAX8 paired box 8  
8054945 BIN1 bridging integrator 1  
8054978 ERCC3 "excision repair cross-complementing rodent repair deficiency, complementation group 3 (xeroderma pigmentosum group B complementing) "  
8055952 NR4A2 "nuclear receptor subfamily 4, group A, member 2 "  
8055992 ACVR1C "activin A receptor, type IC "  
8056005 ACVR1 "activin A receptor, type I "  
8056222 DPP4 dipeptidyl-peptidase 4  
8056257 FAP fibroblast activation protein, alpha  
8056784 DLX2 distal-less homeobox 2  
8056798 SP3 Sp3 transcription factor  
8056909 ATF2 activating transcription factor 2  
8056943 KIAA1715 KIAA1715  
8057506 FRZB frizzled-related protein

|                  |                                                                                                  |
|------------------|--------------------------------------------------------------------------------------------------|
| 8057620 COL5A2   | "collagen, type V, alpha 2 "                                                                     |
| 8058857 IGFBP5   | insulin-like growth factor binding protein 5                                                     |
| 8058914 AAMP     | "angio-associated, migratory cell protein "                                                      |
| 8059014 FEV      | FEV (ETS oncogene family)                                                                        |
| 8059067 IHH      | Indian hedgehog homolog (Drosophila)                                                             |
| 8059071 NHEJ1    | nonhomologous end-joining factor 1                                                               |
| 8059376 SERPINE2 | "serpin peptidase inhibitor, clade E (nexin, plasminogen activator inhibitor type 1), member 2 " |
| 8059525 TM4SF20  | transmembrane 4 L six family member 20                                                           |
| 8059580 DNER     | delta/notch-like EGF repeat containing                                                           |
| 8059739 NPPC     | natriuretic peptide precursor C                                                                  |
| 8059783 NGEF     | neuronal guanine nucleotide exchange factor                                                      |
| 8059989 HES6     | hairy and enhancer of split 6 (Drosophila)                                                       |
| 8060030 HDAC4    | histone deacetylase 4                                                                            |
| 8060286 DTYMK    | deoxythymidylate kinase (thymidylate kinase)                                                     |
| 8060334 SOX12    | SRY (sex determining region Y)-box 12                                                            |
| 8060604 OXT      | "oxytocin, prepropeptide "                                                                       |
| 8060850 BMP2     | bone morphogenetic protein 2                                                                     |
| 8061136 PTMA     | prothymosin, alpha                                                                               |
| 8061303 INSM1    | insulinoma-associated 1                                                                          |
| 8061357 PAX1     | paired box 1                                                                                     |
| 8061564 ID1      | inhibitor of DNA binding 1, dominant negative helix-loop-helix protein                           |
| 8061746 DNMT3B   | DNA (cytosine-5-)-methyltransferase 3 beta                                                       |
| 8062134 GDF5     | growth differentiation factor 5                                                                  |
| 8062319 TGIF2    | TGFB-induced factor homeobox 2                                                                   |
| 8062395 NNAT     | neuronatin                                                                                       |
| 8062527 ADIG     | adipogenin                                                                                       |
| 8062603 TOP1     | topoisomerase (DNA) I                                                                            |
| 8062705 L3MBTL   | l(3)mbt-like (Drosophila)                                                                        |
| 8062981 PIGT     | "phosphatidylinositol glycan anchor biosynthesis, class T "                                      |
| 8063043 UBE2C    | ubiquitin-conjugating enzyme E2C                                                                 |
| 8063115 MMP9     | "matrix metalloproteinase 9 (gelatinase B, 92kDa gelatinase, 92kDa type IV collagenase) "        |
| 8063369 RNF114   | ring finger protein 114                                                                          |
| 8063386 CEBPB    | "CCAAT/enhancer binding protein (C/EBP), beta "                                                  |
| 8063536 TFAP2C   | transcription factor AP-2 gamma (activating enhancer binding protein 2 gamma)                    |
| 8063668 GNAS     | GNAS complex locus                                                                               |
| 8064100 PDPF     | pancreatic progenitor cell differentiation and proliferation factor homolog (zebrafish)          |
| 8064277 MYT1     | myelin transcription factor 1                                                                    |
| 8064844 PCNA     | proliferating cell nuclear antigen                                                               |
| 8064967 MKKS     | McKusick-Kaufman syndrome                                                                        |
| 8064978 JAG1     | jagged 1 (Alagille syndrome)                                                                     |
| 8065334 NKX2-2   | NK2 homeobox 2                                                                                   |
| 8065344 FOXA2    | forkhead box A2                                                                                  |
| 8065668 CDK5RAP1 | CDK5 regulatory subunit associated protein 1                                                     |

|         |         |                                                                                                   |
|---------|---------|---------------------------------------------------------------------------------------------------|
| 8065776 | NCOA6   | nuclear receptor coactivator 6                                                                    |
| 8065905 | GDF5    | growth differentiation factor 5                                                                   |
| 8066051 | NDRG3   | NDRG family member 3                                                                              |
| 8066136 | RBL1    | retinoblastoma-like 1 (p107)                                                                      |
| 8066431 | ADA     | adenosine deaminase                                                                               |
| 8066619 | PLTP    | phospholipid transfer protein                                                                     |
| 8066953 | SPATA2  | spermatogenesis associated 2                                                                      |
| 8067055 | ATP9A   | ATPase, class II, type 9A                                                                         |
| 8067409 | LAMA5   | "laminin, alpha 5 "                                                                               |
| 8067521 | GATA5   | GATA binding protein 5                                                                            |
| 8067554 | TCFL5   | transcription factor-like 5 (basic helix-loop-helix)                                              |
| 8067862 | NF1     | neurofibromin 1                                                                                   |
| 8068024 | JAM2    | junctional adhesion molecule 2                                                                    |
| 8068168 | SOD1    | "superoxide dismutase 1, soluble "                                                                |
| 8068496 | SIM2    | single-minded homolog 2 (Drosophila)                                                              |
| 8068522 | TTC3    | tetratricopeptide repeat domain 3                                                                 |
| 8068866 | PKNOX1  | PBX/knotted 1 homeobox 1                                                                          |
| 8069269 | COL6A1  | collagen, type VI, alpha 1                                                                        |
| 8069301 | COL6A2  | collagen, type VI, alpha 2                                                                        |
| 8070182 | RCAN1   | regulator of calcineurin 1                                                                        |
| 8070194 | RUNX1   | runt-related transcription factor 1                                                               |
| 8070665 | SIK1    | salt-inducible kinase 1                                                                           |
| 8071768 | SMARCB1 | SWI/SNF related, matrix associated, actin dependent regulator of chromatin, subfamily b, member 1 |
| 8072577 | YWHAH   | "tyrosine 3-monooxygenase/tryptophan 5-monooxygenase activation protein, eta polypeptide "        |
| 8072687 | MCM5    | minichromosome maintenance complex component 5                                                    |
| 8072876 | LGALS1  | "lectin, galactoside-binding, soluble, 1 "                                                        |
| 8073007 | MAFF    | v-maf musculoaponeurotic fibrosarcoma oncogene homolog F (avian)                                  |
| 8073022 | CBY1    | chibby homolog 1 (Drosophila)                                                                     |
| 8073148 | ATF4    | activating transcription factor 4 (tax-responsive enhancer element B67)                           |
| 8073522 | SREBF2  | sterol regulatory element binding transcription factor 2                                          |
| 8073733 | NUP50   | nucleoporin 50kDa                                                                                 |
| 8073743 | UPK3A   | uroplakin 3A                                                                                      |
| 8073826 | PPARA   | peroxisome proliferator-activated receptor alpha                                                  |
| 8074791 | MAPK1   | mitogen-activated protein kinase 1                                                                |
| 8075239 | THOC5   | THO complex 5                                                                                     |
| 8075310 | LIF     | leukemia inhibitory factor (cholinergic differentiation factor)                                   |
| 8075493 | PATZ1   | POZ (BTB) and AT hook containing zinc finger 1                                                    |
| 8075728 | MYH9    | "myosin, heavy chain 9, non-muscle "                                                              |
| 8075992 | SOX10   | SRY (sex determining region Y)-box 10                                                             |
| 8076185 | CBX7    | chromobox homolog 7                                                                               |
| 8076331 | TOB2    | "transducer of ERBB2, 2 "                                                                         |
| 8076441 | NFAM1   | NFAT activating protein with ITAM motif 1                                                         |
| 8076586 | SCUBE1  | "signal peptide, CUB domain, EGF-like 1 "                                                         |

|         |          |                                                                          |
|---------|----------|--------------------------------------------------------------------------|
| 8076734 | WNT7B    | wingless-type MMTV integration site family, member 7B                    |
| 8076894 | MLC1     | megalencephalic leukoencephalopathy with subcortical cysts 1             |
| 8076962 | MAPK12   | mitogen-activated protein kinase 12                                      |
| 8077103 | TYMP     | thymidine phosphorylase                                                  |
| 8077262 | DTYMK    | deoxythymidylate kinase (thymidylate kinase)                             |
| 8077503 | CAV3     | caveolin 3                                                               |
| 8077781 | VHL      | von Hippel-Lindau tumor suppressor                                       |
| 8077899 | PPARG    | peroxisome proliferator-activated receptor gamma                         |
| 8078286 | RARB     | "retinoic acid receptor, beta "                                          |
| 8078350 | TGFBR2   | "transforming growth factor, beta receptor II (70/80kDa) "               |
| 8078600 | TCEA1    | "transcription elongation factor A (SII), 1 "                            |
| 8078898 | SLC25A38 | "solute carrier family 25, member 38 "                                   |
| 8079021 | CTNNB1   | "catenin (cadherin-associated protein), beta 1, 88kDa "                  |
| 8079140 | SNRK     | SNF related kinase                                                       |
| 8079153 | ABHD5    | abhydrolase domain containing 5                                          |
| 8080714 | FLNB     | "filamin B, beta "                                                       |
| 8080938 | MITF     | microphthalmia-associated transcription factor                           |
| 8081001 | ROBO2    | "roundabout, axon guidance receptor, homolog 2 (Drosophila) "            |
| 8081235 | COL8A1   | collagen, type VIII, alpha 1                                             |
| 8081657 | CD200    | CD200 molecule                                                           |
| 8081686 | BOC      | Boc homolog (mouse)                                                      |
| 8081740 | ATP6V1A  | ATPase, H <sup>+</sup> transporting, lysosomal 70kDa, V1 subunit A       |
| 8081810 | GAP43    | growth associated protein 43                                             |
| 8082350 | MCM2     | minichromosome maintenance complex component 2                           |
| 8083240 | AGTR1    | "angiotensin II receptor, type 1 "                                       |
| 8083429 | MBNL1    | muscleblind-like (Drosophila)                                            |
| 8083494 | MME      | membrane metallo-endopeptidase                                           |
| 8083594 | PTX3     | pentraxin 3, long                                                        |
| 8083616 | MLF1     | myeloid leukemia factor 1                                                |
| 8083887 | CLDN11   | claudin 11                                                               |
| 8083901 | FNDC3B   | fibronectin type III domain containing 3B                                |
| 8083968 | NLGN1    | neuroligin 1                                                             |
| 8084146 | FXR1     | "fragile X mental retardation, autosomal homolog 1 "                     |
| 8084303 | EIF2B5   | "eukaryotic translation initiation factor 2B, subunit 5 epsilon, 82kDa " |
| 8084397 | ECE2     | endothelin converting enzyme 2                                           |
| 8084496 | CHRD     | chordin                                                                  |
| 8084794 | IL1RAP   | interleukin 1 receptor accessory protein                                 |
| 8084880 | HES1     | "hairy and enhancer of split 1, (Drosophila) "                           |
| 8085138 | OXTR     | oxytocin receptor                                                        |
| 8085206 | CAMK1    | calcium/calmodulin-dependent protein kinase I                            |
| 8085311 | ATP2B2   | "ATPase, Ca <sup>++</sup> transporting, plasma membrane 2 "              |
| 8085475 | WNT7A    | "wingless-type MMTV integration site family, member 7A "                 |
| 8085914 | SLC4A7   | solute carrier family 4, sodium bicarbonate cotransporter, member 7      |

|         |         |                                                                                                                                                |
|---------|---------|------------------------------------------------------------------------------------------------------------------------------------------------|
| 8085946 | EOMES   | eomesodermin homolog ( <i>Xenopus laevis</i> )                                                                                                 |
| 8086517 | CDCP1   | CUB domain containing protein 1                                                                                                                |
| 8087405 | GPX1    | glutathione peroxidase 1                                                                                                                       |
| 8087409 | RHOA    | "ras homolog gene family, member A "                                                                                                           |
| 8087907 | SEMA3G  | sema domain, immunoglobulin domain (Ig), short basic domain, secreted, (semaphorin) 3G                                                         |
| 8088180 | WNT5A   | "wingless-type MMTV integration site family, member 5A "                                                                                       |
| 8088384 | PDHB    | pyruvate dehydrogenase (lipoamide) beta                                                                                                        |
| 8088485 | FEZF2   | FEZ family zinc finger 2                                                                                                                       |
| 8088919 | ROBO1   | "roundabout, axon guidance receptor, homolog 1 ( <i>Drosophila</i> ) "                                                                         |
| 8089082 | DCBLD2  | discoidin, CUB and LCCL domain containing 2                                                                                                    |
| 8089145 | ABI3BP  | ABI family, member 3 (NESH) binding protein                                                                                                    |
| 8089801 | GSK3B   | glycogen synthase kinase 3 beta                                                                                                                |
| 8090044 | SEMA5B  | "sema domain, seven thrombospondin repeats (type 1 and type 1-like), transmembrane domain (TM) and short cytoplasmic domain, (semaphorin) 5B " |
| 8090395 | TXNRD3  | thioredoxin reductase 3                                                                                                                        |
| 8090469 | GATA2   | GATA binding protein 2                                                                                                                         |
| 8091032 | FOXL2   | forkhead box L2                                                                                                                                |
| 8091103 | TFDP2   | transcription factor Dp-2 (E2F dimerization partner 2)                                                                                         |
| 8091190 | ATR     | ataxia telangiectasia and Rad3 related                                                                                                         |
| 8091411 | TM4SF1  | transmembrane 4 L six family member 1                                                                                                          |
| 8091422 | WWTR1   | WW domain containing transcription regulator 1                                                                                                 |
| 8091537 | IGSF10  | "immunoglobulin superfamily, member 10 "                                                                                                       |
| 8091678 | VEPH1   | ventricular zone expressed PH domain homolog 1 (zebrafish)                                                                                     |
| 8091972 | MECOM   | MDS1 and EVI1 complex locus                                                                                                                    |
| 8092691 | BCL6    | B-cell CLL/lymphoma 6                                                                                                                          |
| 8092849 | ATP13A3 | ATPase type 13A3                                                                                                                               |
| 8093053 | TFRC    | transferrin receptor (p90, CD71)                                                                                                               |
| 8093500 | TACC3   | transforming, acidic coiled-coil containing protein 3                                                                                          |
| 8093852 | MSX1    | msh homeobox 1                                                                                                                                 |
| 8094030 | AFAP1   | actin filament associated protein 1                                                                                                            |
| 8094278 | NCAPG   | non-SMC condensin I complex, subunit G                                                                                                         |
| 8094301 | SLIT2   | slit homolog 2 ( <i>Drosophila</i> )                                                                                                           |
| 8095021 | SPATA18 | spermatogenesis associated 18 homolog (rat)                                                                                                    |
| 8095074 | GSX2    | GS homeobox 2                                                                                                                                  |
| 8095080 | PDGFRA  | platelet-derived growth factor receptor, alpha polypeptide                                                                                     |
| 8095110 | KIT     | v-kit Hardy-Zuckerman 4 feline sarcoma viral oncogene homolog                                                                                  |
| 8095262 | REST    | RE1-silencing transcription factor                                                                                                             |
| 8095545 | RUFY3   | RUN and FYVE domain containing 3                                                                                                               |
| 8095585 | SLC4A4  | solute carrier family 4, sodium bicarbonate cotransporter, member 4                                                                            |
| 8095870 | CCNG2   | cyclin G2                                                                                                                                      |
| 8096004 | BMP2K   | BMP2 inducible kinase                                                                                                                          |
| 8096050 | FGF5    | fibroblast growth factor 5                                                                                                                     |
| 8096070 | BMP3    | bone morphogenetic protein 3                                                                                                                   |
| 8096098 | COPS4   | COP9 constitutive photomorphogenic homolog subunit 4 ( <i>Arabidopsis</i> )                                                                    |

8096160 ARHGAP24 Rho GTPase activating protein 24  
 8096461 ATOH1 atonal homolog 1 (Drosophila)  
 8096511 BMPR1B "bone morphogenetic protein receptor, type IB"  
 8096635 NFKB1 nuclear factor of kappa light polypeptide gene enhancer in B-cells 1  
 8097256 FGF2 fibroblast growth factor 2 (basic)  
 8097262 SPATA5 spermatogenesis associated 5  
 8097282 SPRY1 sprouty homolog 1, antagonist of FGF signaling (Drosophila)  
 8097356 PLK4 polo-like kinase 4 (Drosophila)  
 8097480 NAA15 "N(alpha)-acetyltransferase 15, NatA auxiliary subunit"  
 8097553 IL15 interleukin 15  
 8097657 SMAD1 SMAD family member 1  
 8097687 POU4F2 POU class 4 homeobox 2  
 8097782 RPS3A ribosomal protein S3A  
 8098006 GLRB glycine receptor, beta  
 8098571 HELT HES/HEY-like transcription factor  
 8098576 SLC25A4 solute carrier family 25 (mitochondrial carrier; adenine nucleotide translocator), member 4  
 8098611 TLR3 toll-like receptor 3  
 8098880 CTBP1 C-terminal binding protein 1  
 8099132 CYTL1 cytokine-like 1  
 8099259 AFAP1 actin filament associated protein 1  
 8099524 LDB2 LIM domain binding 2  
 8099633 PPARC1A "peroxisome proliferator-activated receptor gamma, coactivator 1 alpha"  
 8099965 ACOT7 acyl-CoA thioesterase 7  
 8101507 NKX6-1 NK6 homeobox 1  
 8102560 MAD2L1 MAD2 mitotic arrest deficient-like 1 (yeast)  
 8102655 BBS7 Bardet-Biedl syndrome 7  
 8102789 TERF1 telomeric repeat binding factor (NIMA-interacting) 1  
 8103728 HMGB2 high-mobility group box 2  
 8103822 VEGFC vascular endothelial growth factor C  
 8103922 CASP3 "caspase 3, apoptosis-related cysteine peptidase"  
 8104079 FAT1 FAT tumor suppressor homolog 1 (Drosophila)  
 8104234 TRIP13 thyroid hormone receptor interactor 13  
 8104369 SRD5A1 "steroid-5-alpha-reductase, alpha polypeptide 1 (3-oxo-5 alpha-steroid delta 4-dehydrogenase alpha 1)"  
 8104449 CCT5 chaperonin containing TCP1, subunit 5 (epsilon)  
 8104901 IL7R interleukin 7 receptor  
 8104912 SKP2 S-phase kinase-associated protein 2 (p45)  
 8104930 SLC1A3 "solute carrier family 1 (glial high affinity glutamate transporter), member 3"  
 8105067 PTGER4 prostaglandin E receptor 4 (subtype EP4)  
 8105267 ITGA2 "integrin, alpha 2 (CD49B, alpha 2 subunit of VLA-2 receptor)"  
 8105302 FST follistatin  
 8105523 KIF2A kinesin heavy chain member 2A  
 8105828 CCNB1 cyclin B1  
 8105862 CDK7 cyclin-dependent kinase 7

|         |         |                                                                                                                                                |
|---------|---------|------------------------------------------------------------------------------------------------------------------------------------------------|
| 8106098 | MAP1B   | microtubule-associated protein 1B                                                                                                              |
| 8106210 | RGNEF   | 190 kDa guanine nucleotide exchange factor                                                                                                     |
| 8106730 | XRCC4   | X-ray repair complementing defective repair in Chinese hamster cells 4                                                                         |
| 8106923 | NR2F1   | nuclear receptor subfamily 2, group F, member 1                                                                                                |
| 8107330 | APC     | adenomatous polyposis coli                                                                                                                     |
| 8107470 | PTMA    | prothymosin, alpha                                                                                                                             |
| 8107613 | SNX2    | sorting nexin 2                                                                                                                                |
| 8107646 | PRDM6   | PR domain containing 6                                                                                                                         |
| 8108238 | SMAD5   | SMAD family member 5                                                                                                                           |
| 8108370 | EGR1    | early growth response 1                                                                                                                        |
| 8108861 | NDFIP1  | Nedd4 family interacting protein 1                                                                                                             |
| 8108949 | POU4F3  | POU class 4 homeobox 3                                                                                                                         |
| 8109086 | ADRB2   | "adrenergic, beta-2-, receptor, surface "                                                                                                      |
| 8109120 | AFAP1L1 | actin filament associated protein 1-like 1                                                                                                     |
| 8109194 | SLC26A2 | "solute carrier family 26 (sulfate transporter), member 2 "                                                                                    |
| 8109639 | PTTG1   | pituitary tumor-transforming 1 // pituitary tumor-transforming 1                                                                               |
| 8109697 | CCNG1   | cyclin G1                                                                                                                                      |
| 8109969 | TLX3    | T-cell leukemia homeobox 3                                                                                                                     |
| 8109981 | FGF18   | fibroblast growth factor 18                                                                                                                    |
| 8110084 | MSX2    | msh homeobox 2                                                                                                                                 |
| 8110090 | SFXN1   | sideroflexin 1                                                                                                                                 |
| 8110569 | SQSTM1  | sequestosome 1                                                                                                                                 |
| 8110783 | TERT    | telomerase reverse transcriptase                                                                                                               |
| 8110932 | SEMA5A  | "sema domain, seven thrombospondin repeats (type 1 and type 1-like), transmembrane domain (TM) and short cytoplasmic domain, (semaphorin) 5A " |
| 8111677 | LIFR    | leukemia inhibitory factor receptor alpha                                                                                                      |
| 8111772 | DAB2    | "disabled homolog 2, mitogen-responsive phosphoprotein (Drosophila) "                                                                          |
| 8112139 | IL6ST   | "interleukin 6 signal transducer (gp130, oncostatin M receptor) "                                                                              |
| 8112202 | PLK2    | polo-like kinase 2                                                                                                                             |
| 8112772 | AP3B1   | "adaptor-related protein complex 3, beta 1 subunit "                                                                                           |
| 8112940 | SSBP2   | single-stranded DNA binding protein 2                                                                                                          |
| 8113010 | CCNH    | cyclin H                                                                                                                                       |
| 8113039 | MEF2C   | myocyte enhancer factor 2C                                                                                                                     |
| 8113250 | ERAP1   | endoplasmic reticulum aminopeptidase 1                                                                                                         |
| 8113433 | EFNA5   | ephrin-A5                                                                                                                                      |
| 8113573 | TSSK1B  | testis-specific serine kinase 1B                                                                                                               |
| 8113666 | SEMA6A  | "sema domain, transmembrane domain (TM), and cytoplasmic domain, (semaphorin) 6A "                                                             |
| 8114010 | IRF1    | interferon regulatory factor 1                                                                                                                 |
| 8114158 | PPP2CA  | "protein phosphatase 2, catalytic subunit, alpha isozyme "                                                                                     |
| 8114245 | NEUROG1 | neurogenin 1                                                                                                                                   |
| 8114583 | SRA1    | steroid receptor RNA activator 1                                                                                                               |
| 8114612 | CD14    | CD14 molecule                                                                                                                                  |
| 8114691 | HDAC3   | histone deacetylase 3                                                                                                                          |
| 8114805 | FGF1    | fibroblast growth factor 1 (acidic)                                                                                                            |

8114814 NR3C1 nuclear receptor subfamily 3, group C, member 1 (glucocorticoid receptor)  
 8115147 CD74 "CD74 molecule, major histocompatibility complex, class II invariant chain"  
 8115158 RPS14 ribosomal protein S14  
 8115234 ANXA6 annexin A6  
 8115327 SPARC "secreted protein, acidic, cysteine-rich (osteonectin)"  
 8115691 SLIT3 slit homolog 3 (Drosophila)  
 8115814 SH3PXD2B SH3 and PX domains 2B  
 8115840 NKX2-5 "NK2 transcription factor related, locus 5 (Drosophila)"  
 8116051 DBN1 drebrin 1  
 8116070 PDLIM7 PDZ and LIM domain 7 (enigma)  
 8116162 PROP1 PROP paired-like homeobox 1  
 8116402 MAPK9 mitogen-activated protein kinase 9  
 8116591 FOXC1 forkhead box C1  
 8116649 TUBB2A "tubulin, beta 2A"  
 8116653 TUBB2A "tubulin, beta 2A"  
 8116740 RREB1 ras responsive element binding protein 1  
 8116780 DSP desmoplakin  
 8116921 EDN1 endothelin 1  
 8116983 CD83 CD83 molecule  
 8116998 JARID2 "jumonji, AT rich interactive domain 2"  
 8117120 ID4 "inhibitor of DNA binding 4, dominant negative helix-loop-helix protein"  
 8117165 SOX4 SRY (sex determining region Y)-box 4  
 8117900 DDR1 discoidin domain receptor tyrosine kinase 1  
 8117995 TUBB "tubulin, beta"  
 8118726 GGNBP1 gametogenetin binding protein 1  
 8118945 PPARD peroxisome proliferator-activated receptor delta  
 8119080 SRSF3 serine/arginine-rich splicing factor 3  
 8119088 CDKN1A cyclin-dependent kinase inhibitor 1A (p21, Cip1)  
 8119466 MDFI MyoD family inhibitor  
 8119503 TAF8 "TAF8 RNA polymerase II, TATA box binding protein (TBP)-associated factor, 43kDa"  
 8119712 SRF serum response factor (c-fos serum response element-binding transcription factor)  
 8119898 VEGFA vascular endothelial growth factor A  
 8119974 SLC29A1 solute carrier family 29 (nucleoside transporters), member 1  
 8120043 RUNX2 runt-related transcription factor 2  
 8120215 PAQR8 progesterin and adipoQ receptor family member VIII  
 8120585 SMAP1 small ArfGAP 1  
 8120783 MYO6 myosin VI  
 8120967 NT5E 5'-nucleotidase, ecto (CD73)  
 8121209 POU3F2 POU class 3 homeobox 2  
 8121257 PRDM1 PR domain containing 1, with ZNF domain  
 8121365 FOXO3 forkhead box O3  
 8121704 NUS1 nuclear undecaprenyl pyrophosphate synthase 1 homolog (S. cerevisiae)  
 8121850 HEY2 hairy/enhancer-of-split related with YRPW motif 2

|                 |                                                                                        |
|-----------------|----------------------------------------------------------------------------------------|
| 8122099 ENPP1   | ectonucleotide pyrophosphatase/phosphodiesterase 1                                     |
| 8122176 TCF21   | transcription factor 21                                                                |
| 8122242 PEX7    | peroxisomal biogenesis factor 7                                                        |
| 8122334 CCRL1   | chemokine (C-C motif) receptor-like 1                                                  |
| 8123315 QKI     | "quaking homolog, KH domain RNA binding (mouse) "                                      |
| 8123494 FAM120B | family with sequence similarity 120B                                                   |
| 8123644 TUBB2A  | "tubulin, beta 2A "                                                                    |
| 8123651 TUBB2B  | "tubulin, beta 2B "                                                                    |
| 8124280 FAM65B  | "family with sequence similarity 65, member B "                                        |
| 8124654 GABBR1  | "gamma-aminobutyric acid (GABA) B receptor, 1 "                                        |
| 8124848 IER3    | immediate early response 3                                                             |
| 8124862 CDSN    | corneodesmosin                                                                         |
| 8124868 CCHCR1  | coiled-coil alpha-helical rod protein 1                                                |
| 8124889 POU5F1  | POU class 5 homeobox 1                                                                 |
| 8125295 ATF6B   | activating transcription factor 6 beta                                                 |
| 8125383 NOTCH4  | Notch homolog 4 (Drosophila)                                                           |
| 8125545 HLA-DOA | "major histocompatibility complex, class II, DO alpha "                                |
| 8125568 COL11A2 | "collagen, type XI, alpha 2 "                                                          |
| 8125713 TAPBP   | TAP binding protein (tapasin)                                                          |
| 8125941 SRPK1   | SFRS protein kinase 1                                                                  |
| 8126102 MDGA1   | MAM domain containing glycosylphosphatidylinositol anchor 1                            |
| 8126474 MEA1    | male-enhanced antigen 1                                                                |
| 8126574 YIPF3   | "Yip1 domain family, member 3 "                                                        |
| 8127031 MCM3    | minichromosome maintenance complex component 3                                         |
| 8127446 COL9A1  | "collagen, type IX, alpha 1 "                                                          |
| 8127841 PGM3    | phosphoglucomutase 3                                                                   |
| 8128429 CCNC    | cyclin C                                                                               |
| 8128669 OSTM1   | osteopetrosis associated transmembrane protein 1                                       |
| 8128991 LAMA4   | "laminin, alpha 4 "                                                                    |
| 8129562 CTGF    | connective tissue growth factor                                                        |
| 8129937 CITED2  | "Cbp/p300-interacting transactivator, with Glu/Asp-rich carboxy-terminal domain, 2 "   |
| 8130211 SYNE1   | "spectrin repeat containing, nuclear envelope 1 "                                      |
| 8130505 EZR     | ezrin                                                                                  |
| 8130556 SOD2    | "superoxide dismutase 2, mitochondrial "                                               |
| 8130939 DLL1    | delta-like 1 (Drosophila)                                                              |
| 8131087 UNCX    | UNC homeobox                                                                           |
| 8131253 FOXK1   | forkhead box K1                                                                        |
| 8131374 AIMP2   | aminoacyl tRNA synthetase complex-interacting multifunctional protein 2                |
| 8131475 C1GALT1 | "core 1 synthase, glycoprotein-N-acetylgalactosamine 3-beta-galactosyltransferase, 1 " |
| 8131550 SCIN    | scinderin                                                                              |
| 8131583 BZW2    | basic leucine zipper and W2 domains 2                                                  |
| 8131631 HDAC9   | histone deacetylase 9                                                                  |
| 8131803 IL6     | "interleukin 6 (interferon, beta 2) "                                                  |

8131844 GPNMB glycoprotein (transmembrane) nmb  
 8131996 CREB5 cAMP responsive element binding protein 5  
 8132036 WIPF3 "WAS/WASL interacting protein family, member 3 "  
 8132218 BBS9 Bardet-Biedl syndrome 9  
 8132805 VWC2 von Willebrand factor C domain containing 2  
 8132860 EGFR "epidermal growth factor receptor (erythroblastic leukemia viral (v-erb-b) oncogene homolog, avian) "  
 8134117 FZD1 frizzled homolog 1 (Drosophila)  
 8134263 COL1A2 collagen, type I, alpha 2  
 8134339 PEG10 paternally expressed 10  
 8134407 DLX6 distal-less homeobox 6  
 8134907 EPO erythropoietin  
 8135069 SERPINE1 serpin peptidase inhibitor, clade E (nexin, plasminogen activator inhibitor type 1), member 1  
 8135149 SH2B2 SH2B adaptor protein 2  
 8135218 LRRC17 leucine rich repeat containing 17  
 8135277 MLL5 "myeloid/lymphoid or mixed-lineage leukemia 5 (trithorax homolog, Drosophila) "  
 8135514 IFRD1 interferon-related developmental regulator 1  
 8135594 CAV1 "caveolin 1, caveolae protein, 22kDa "  
 8135763 WNT16 wingless-type MMTV integration site family, member 16  
 8136080 SMO smoothed homolog (Drosophila)  
 8137865 GNA12 guanine nucleotide binding protein (G protein) alpha 12  
 8137979 ACTB actin, beta  
 8138189 RPA3 replication protein A3, 14kDa  
 8138442 TWIST1 twist homolog 1 (Drosophila)  
 8138602 DFNA5 "deafness, autosomal dominant 5 "  
 8139087 SFRP4 secreted frizzled-related protein 4  
 8139207 INHBA "inhibin, beta A "  
 8139212 GLI3 GLI family zinc finger 3  
 8139430 PURB purine-rich element binding protein B  
 8139488 IGFBP3 insulin-like growth factor binding protein 3  
 8140319 HIP1 huntingtin interacting protein 1  
 8140398 YWHAG "tyrosine 3-monooxygenase/tryptophan 5-monooxygenase activation protein, gamma polypeptide "  
 8140556 HGF hepatocyte growth factor (hepapoietin A; scatter factor)  
 8140650 SEMA3E "sema domain, immunoglobulin domain (Ig), short basic domain, secreted, (semaphorin) 3E "  
 8140668 SEMA3A "sema domain, immunoglobulin domain (Ig), short basic domain, secreted, (semaphorin) 3A "  
 8140686 SEMA3D "sema domain, immunoglobulin domain (Ig), short basic domain, secreted, (semaphorin) 3D "  
 8140955 CDK6 cyclin-dependent kinase 6  
 8141016 TFPI2 tissue factor pathway inhibitor 2  
 8141050 RPS3A ribosomal protein S3A  
 8141140 DLX5 distal-less homeobox 5  
 8141222 RPS3A ribosomal protein S3A  
 8141241 SMURF1 SMAD specific E3 ubiquitin protein ligase 1  
 8141380 ZNF3 zinc finger protein 3  
 8141466 GPC2 glypican 2

|         |           |                                                                                                      |
|---------|-----------|------------------------------------------------------------------------------------------------------|
| 8141950 | RELN      | reelin                                                                                               |
| 8142036 | SRPK2     | SFRS protein kinase 2                                                                                |
| 8142468 | TPM3      | tropomyosin 3                                                                                        |
| 8142471 | WNT2      | wingless-type MMTV integration site family member 2                                                  |
| 8142580 | FEZF1     | FEZ family zinc finger 1                                                                             |
| 8142747 | PAX4      | paired box 4                                                                                         |
| 8142981 | PODXL     | podocalyxin-like                                                                                     |
| 8143188 | CREB3L2   | cAMP responsive element binding protein 3-like 2                                                     |
| 8143772 | RARRES2   | retinoic acid receptor responder (tazarotene induced) 2                                              |
| 8143850 | CDK5      | cyclin-dependent kinase 5                                                                            |
| 8143919 | SMARCD3   | "SWI/SNF related, matrix associated, actin dependent regulator of chromatin, subfamily d, member 3 " |
| 8144078 | SHH       | sonic hedgehog homolog (Drosophila)                                                                  |
| 8144112 | MNX1      | motor neuron and pancreas homeobox 1                                                                 |
| 8144267 | CLN8      | "ceroid-lipofuscinosis, neuronal 8 (epilepsy, progressive with mental retardation) "                 |
| 8144279 | CLN8      | "ceroid-lipofuscinosis, neuronal 8 (epilepsy, progressive with mental retardation) "                 |
| 8144643 | GATA4     | GATA binding protein 4                                                                               |
| 8144758 | ZDHC2     | zinc finger, DHC-type containing 2                                                                   |
| 8145055 | BMP1      | bone morphogenetic protein 1                                                                         |
| 8145470 | DPYSL2    | dihydropyrimidinase-like 2                                                                           |
| 8145490 | PTK2B     | PTK2B protein tyrosine kinase 2 beta                                                                 |
| 8145736 | NRG1      | neuregulin 1                                                                                         |
| 8145865 | GPR124    | G protein-coupled receptor 124                                                                       |
| 8145954 | TACC1     | transforming, acidic coiled-coil containing protein 1                                                |
| 8146000 | ADAM9     | ADAM metallopeptidase domain 9 (meltrin gamma)                                                       |
| 8146216 | VDAC3     | voltage-dependent anion channel 3                                                                    |
| 8146357 | MCM4      | minichromosome maintenance complex component 4                                                       |
| 8146462 | SOX17     | SRY (sex determining region Y)-box 17                                                                |
| 8146500 | LYN       | v-yes-1 Yamaguchi sarcoma viral related oncogene homolog                                             |
| 8146645 | BHLHE22   | "basic helix-loop-helix family, member e22 "                                                         |
| 8146914 | TERF1     | telomeric repeat binding factor (NIMA-interacting) 1                                                 |
| 8147049 | FABP5     | fatty acid binding protein 5 (psoriasis-associated)                                                  |
| 8147461 | SDC2      | syndecan 2                                                                                           |
| 8147516 | MATN2     | matrilin 2                                                                                           |
| 8148317 | MYC       | v-myc myelocytomatosis viral oncogene homolog (avian)                                                |
| 8148559 | C8orf55   | chromosome 8 open reading frame 55                                                                   |
| 8148572 | LY6E      | lymphocyte antigen 6 complex, locus E                                                                |
| 8148597 | ZFP41     | zinc finger protein 41 homolog (mouse)                                                               |
| 8149330 | CTSB      | cathepsin B                                                                                          |
| 8149749 | TNFRSF10D | tumor necrosis factor receptor superfamily, member 10d, decoy with truncated death domain            |
| 8149820 | NKX2-6    | "NK2 transcription factor related, locus 6 (Drosophila) "                                            |
| 8149825 | STC1      | stanniocalcin 1                                                                                      |
| 8149927 | CLU       | clusterin                                                                                            |
| 8149955 | PBK       | PDZ binding kinase                                                                                   |

8150287 WHSC1L1 Wolf-Hirschhorn syndrome candidate 1-like 1  
8150318 FGFR1 fibroblast growth factor receptor 1  
8150428 SFRP1 secreted frizzled-related protein 1  
8150491 MYST3 MYST histone acetyltransferase (monocytic leukemia) 3  
8150592 CEBPD CCAAT/enhancer binding protein (C/EBP), delta  
8150599 PRKDC "protein kinase, DNA-activated, catalytic polypeptide "  
8150698 SNAI2 snail homolog 2 (Drosophila)  
8150818 TCEA1 "transcription elongation factor A (SII), 1 "  
8150830 LYPLA1 lysophospholipase I  
8151310 EYA1 eyes absent homolog 1 (Drosophila)  
8151711 NBN nibrin  
8151768 RUNX1T1 "runt-related transcription factor 1; translocated to, 1 (cyclin D-related) "  
8151906 GDF6 growth differentiation factor 6  
8152215 KLF10 Kruppel-like factor 10  
8152280 LRP12 low density lipoprotein receptor-related protein 12  
8152297 ANGPT1 angiopoietin 1  
8152491 EXT1 exostosin 1  
8152512 TNFRSF11B tumor necrosis factor receptor superfamily, member 11b  
8153175 TRAPPC9 trafficking protein particle complex 9  
8153449 EEF1D eukaryotic translation elongation factor 1 delta (guanine nucleotide exchange protein)  
8153457 EEF1D eukaryotic translation elongation factor 1 delta (guanine nucleotide exchange protein)  
8153497 SCRIB scribbled homolog (Drosophila)  
8153828 FOXH1 forkhead box H1  
8154043 DMRT3 doublesex and mab-3 related transcription factor 3  
8154100 VLDLR very low density lipoprotein receptor  
8154178 JAK2 Janus kinase 2  
8154316 UHRF2 ubiquitin-like with PHD and ring finger domains 2  
8154656 DMRTA1 DMRT-like family A1  
8155096 CREB3 cAMP responsive element binding protein 3  
8155849 ANXA1 annexin A1  
8155883 OSTF1 osteoclast stimulating factor 1  
8156134 NTRK2 "neurotrophic tyrosine kinase, receptor, type 2 "  
8156290 CKS2 CDC28 protein kinase regulatory subunit 2  
8156309 GADD45G "growth arrest and DNA-damage-inducible, gamma "  
8156783 COL15A1 "collagen, type XV, alpha 1 "  
8156826 TGFBR1 "transforming growth factor, beta receptor 1 "  
8157487 PAPPA "pregnancy-associated plasma protein A, pappalysin 1 "  
8157516 TRIM32 tripartite motif-containing 32  
8157524 TLR4 toll-like receptor 4  
8157922 LMX1B "LIM homeobox transcription factor 1, beta "  
8158112 CDK9 cyclin-dependent kinase 9  
8158269 ODF2 outer dense fiber of sperm tails 2  
8158424 LRRC8A "leucine rich repeat containing 8 family, member A "

|         |          |                                                                                                                     |
|---------|----------|---------------------------------------------------------------------------------------------------------------------|
| 8158725 | ABL1     | c-abl oncogene 1, non-receptor tyrosine kinase                                                                      |
| 8158890 | NTNG2    | netrin G2                                                                                                           |
| 8159127 | RXRA     | "retinoid X receptor, alpha "                                                                                       |
| 8159318 | GPSM1    | "G-protein signaling modulator 1 (AGS3-like, C. elegans) "                                                          |
| 8159850 | VLDLR    | very low density lipoprotein receptor                                                                               |
| 8160238 | PSIP1    | PC4 and SFRS1 interacting protein 1                                                                                 |
| 8160441 | CDKN2A   | "cyclin-dependent kinase inhibitor 2A (melanoma, p16, inhibits CDK4) "                                              |
| 8160452 | CDKN2B   | "cyclin-dependent kinase inhibitor 2B (p15, inhibits CDK4) "                                                        |
| 8160647 | BAG1     | BCL2-associated athanogene                                                                                          |
| 8160663 | AQP7     | aquaporin 7                                                                                                         |
| 8160670 | AQP3     | aquaporin 3 (Gill blood group)                                                                                      |
| 8160914 | VCP      | valosin-containing protein                                                                                          |
| 8161211 | PAX5     | paired box 5                                                                                                        |
| 8161255 | SHB      | Src homology 2 domain containing adaptor protein B                                                                  |
| 8161906 | GNAQ     | "guanine nucleotide binding protein (G protein), q polypeptide "                                                    |
| 8162236 | SEMA4D   | "sema domain, immunoglobulin domain (Ig), transmembrane domain (TM) and short cytoplasmic domain, (semaphorin) 4D " |
| 8162472 | BARX1    | BARX homeobox 1                                                                                                     |
| 8162533 | PTCH1    | patched 1                                                                                                           |
| 8162759 | TBC1D2   | TBC1 domain family, member 2                                                                                        |
| 8162940 | ABCA1    | "ATP-binding cassette, sub-family A (ABC1), member 1 "                                                              |
| 8163002 | KLF4     | Kruppel-like factor 4 (gut)                                                                                         |
| 8163202 | SVEP1    | sushi, von Willebrand factor type A, EGF and pentraxin domain containing 1                                          |
| 8163444 | ZFP37    | zinc finger protein 37 homolog (mouse)                                                                              |
| 8163672 | PAPPA    | "pregnancy-associated plasma protein A, pappalysin 1 "                                                              |
| 8163733 | CDK5RAP2 | CDK5 regulatory subunit associated protein 2                                                                        |
| 8163936 | LHX6     | LIM homeobox 6                                                                                                      |
| 8164013 | STRBP    | spermatid perinuclear RNA binding protein                                                                           |
| 8164077 | NR5A1    | "nuclear receptor subfamily 5, group A, member 1 "                                                                  |
| 8164269 | ENG      | endoglin                                                                                                            |
| 8164781 | TSC1     | tuberous sclerosis 1                                                                                                |
| 8165038 | SOHLH1   | spermatogenesis and oogenesis specific basic helix-loop-helix 1                                                     |
| 8165217 | NOTCH1   | "Notch homolog 1, translocation-associated (Drosophila) "                                                           |
| 8165309 | EDF1     | endothelial differentiation-related factor 1                                                                        |
| 8166079 | EGFL6    | "EGF-like-domain, multiple 6 "                                                                                      |
| 8166266 | NHS      | Nance-Horan syndrome (congenital cataracts and dental anomalies)                                                    |
| 8166455 | PRDX4    | peroxiredoxin 4                                                                                                     |
| 8167347 | SUV39H1  | suppressor of variegation 3-9 homolog 1 (Drosophila)                                                                |
| 8167407 | ERAS     | ES cell expressed Ras                                                                                               |
| 8167973 | HEPH     | hephaestin                                                                                                          |
| 8167998 | AR       | androgen receptor                                                                                                   |
| 8168045 | EFNB1    | ephrin-B1                                                                                                           |
| 8168205 | FOXO4    | forkhead box O4                                                                                                     |
| 8168472 | ATP7A    | "ATPase, Cu <sup>++</sup> transporting, alpha polypeptide "                                                         |

|         |          |                                                                                                      |
|---------|----------|------------------------------------------------------------------------------------------------------|
| 8168691 | DIAPH2   | diaphanous homolog 2 (Drosophila)                                                                    |
| 8168794 | CENPI    | centromere protein I                                                                                 |
| 8169061 | PLP1     | proteolipid protein 1                                                                                |
| 8169640 | SLC25A5  | solute carrier family 25 (mitochondrial carrier; adenine nucleotide translocator), member 5          |
| 8170119 | FHL1     | four and a half LIM domains 1                                                                        |
| 8170753 | SRPK3    | SFRS protein kinase 3                                                                                |
| 8170921 | PLXNA3   | plexin A3                                                                                            |
| 8171867 | ARX      | aristaless related homeobox                                                                          |
| 8172520 | TFE3     | transcription factor binding to IGHM enhancer 3                                                      |
| 8172905 | HSD17B10 | hydroxysteroid (17-beta) dehydrogenase 10                                                            |
| 8172914 | HUWE1    | "HECT, UBA and WWE domain containing 1 "                                                             |
| 8173299 | EDA2R    | ectodysplasin A2 receptor                                                                            |
| 8173673 | ATRX     | alpha thalassemia/mental retardation syndrome X-linked                                               |
| 8174201 | BEX1     | "brain expressed, X-linked 1 "                                                                       |
| 8174253 | MORF4L2  | mortality factor 4 like 2                                                                            |
| 8174361 | TSC22D3  | TSC22 domain family, member 3                                                                        |
| 8174675 | SLC25A5  | solute carrier family 25 (mitochondrial carrier; adenine nucleotide translocator), member 5          |
| 8174985 | SMARCA1  | "SWI/SNF related, matrix associated, actin dependent regulator of chromatin, subfamily a, member 1 " |
| 8175177 | MBNL3    | muscleblind-like 3 (Drosophila)                                                                      |
| 8175528 | SOX3     | SRY (sex determining region Y)-box 3                                                                 |
| 8176276 | ATRX     | alpha thalassemia/mental retardation syndrome X-linked                                               |
| 8177462 | CDK7     | cyclin-dependent kinase 7                                                                            |
| 8177858 | TUBB     | "tubulin, beta "                                                                                     |
| 8177867 | DDR1     | discoidin domain receptor tyrosine kinase 1                                                          |
| 8178298 | GABBR1   | "gamma-aminobutyric acid (GABA) B receptor, 1 "                                                      |
| 8178435 | IER3     | immediate early response 3                                                                           |
| 8178442 | CDSN     | corneodesmosin                                                                                       |
| 8178448 | CCHCR1   | coiled-coil alpha-helical rod protein 1                                                              |
| 8178470 | POU5F1   | POU class 5 homeobox 1                                                                               |
| 8178727 | ATF6B    | activating transcription factor 6 beta                                                               |
| 8178897 | COL11A2  | "collagen, type XI, alpha 2 "                                                                        |
| 8178977 | TAPBP    | TAP binding protein (tapasin)                                                                        |
| 8179174 | TUBB     | "tubulin, beta "                                                                                     |
| 8179184 | DDR1     | discoidin domain receptor tyrosine kinase 1                                                          |
| 8179595 | GABBR1   | "gamma-aminobutyric acid (GABA) B receptor, 1 "                                                      |
| 8179704 | IER3     | immediate early response 3                                                                           |
| 8179716 | CDSN     | corneodesmosin                                                                                       |
| 8179719 | POU5F1   | POU class 5 homeobox 1                                                                               |
| 8180093 | HLA-DOA  | "major histocompatibility complex, class II, DO alpha "                                              |
| 8180105 | COL11A2  | "collagen, type XI, alpha 2 "                                                                        |
| 8180166 | TAPBP    | TAP binding protein (tapasin)                                                                        |
