# Supplementary material for: Characterization of proliferation, differentiation potential, and gene expression among clonal cultures of human dental pulp cells
Source: PubMed Central journal article supplement (PMC7324427; doi:10.1007/s13577-020-00327-9), 2020-03-16
Supplement: 13577_2020_327_MOESM3_ESM.pdf [file 13577_2020_327_MOESM3_ESM.pdf]

**characterization of proliferation, differentiation potential, and gene expression among clonal cultures of human dental pulp cells**

Tomoko Kobayashi<sup>1,2</sup>, Daisuke Torii<sup>3</sup>, Takanori Iwata<sup>2</sup>, Yuichi Izumi<sup>2,4</sup>, Masanori Nasu<sup>1</sup>, Takeo W. Tsutsui<sup>3</sup>

1 Research Center for Odontology, School of Life Dentistry at Tokyo, The Nippon Dental University

2 Department of Periodontology, Graduate School of Medical and Dental Sciences, Tokyo Medical and Dental University (TMDU)

3 Department of Pharmacology, School of Life Dentistry at Tokyo, The Nippon Dental University

4 Oral Care Perio Center, Southern TOHOKU General Hospital, Southern TOHOKU Research Institute for Neuroscience

Corresponding author: Takeo W. Tsutsui (ryuryu@tky.ndu.ac.jp)

**Supplemental Table S3** . Sources of the probeset list of gene groups related to ‘stemness or differentiation’ .

Genes were extracted from the database of listed Ingenuity Pathway Analysis (IPA) biofunctions, Gene Ontology, and published scientific literature.

| IPA BioFunction                                        |
|--------------------------------------------------------|
| activation of mesenchymal stem cells                   |
| activation of mesenchymal stem cells list              |
| adipogenesis of mesenchymal stem cells                 |
| adipogenesis of mesenchymal stem cells list            |
| chondrogenesis of mesenchymal stem cells               |
| chondrogenesis of mesenchymal stem cells list          |
| Differentiation of adipose mesenchymal stem cells      |
| Differentiation of adipose mesenchymal stem cells list |
| Differentiation of mesenchymal stem cells              |
| Differentiation of mesenchymal stem cells list         |
| lifespan of mesenchymal stem cells                     |
| lifespan of mesenchymal stem cells list                |
| mineralization of mesenchymal stem cells               |
| mineralization of mesenchymal stem cells list          |
| pluripotency of mesenchymal stem cells                 |
| pluripotency of mesenchymal stem cells list            |
| proliferation of mesenchymal stem cells                |
| proliferation of mesenchymal stem cells list           |
| self-renewal of mesenchymal stem cells                 |
| self-renewal of mesenchymal stem cells list            |

| Gene Ontology                                                           |
|-------------------------------------------------------------------------|
| genes which include “stem cell” in its GO Biological process Term       |
| genes which include “ossification” in its GO Biological process Term    |
| genes which include “differentiation” in its GO Biological process Term |

| literature (DOI)                        |
|-----------------------------------------|
| DOI: 10.1016/s0006-291x(02)00661-7      |
| DOI: 10.1016/s0014-4827(02)00012-5      |
| DOI: 10.1016/s0014-4827(03)00349-5      |
| DOI: 10.1177/154405910408300802         |
| DOI: 10.1111/j.1601-6343.2005.00331.x   |
| DOI: 10.1111/j.1600-0722.2005.00221.x   |
| DOI: 10.1634/stemcells.2005-0604        |
| DOI: 10.1634/stemcells.2006-0161        |
| DOI: 10.1152/physiolgenomics.00197.2006 |
| DOI: 10.1016/j.joen.2007.02.009         |
| DOI: 10.1634/stemcells.2007-0225        |
| DOI: 10.1016/j.bbrc.2007.10.149         |
| DOI: 10.1177/154405910808700206         |
| DOI: 10.1177/154405910808700312         |
| DOI: 10.1186/1471-2164-9-340            |
| DOI: 10.1016/j.joen.2008.06.014         |
| DOI: 10.1016/j.archoralbio.2008.10.003  |
| DOI: 10.1111/j.1365-263X.2008.00964.x   |
| DOI: 10.1177/0022034509342363           |
| DOI: 10.1089/ten.TEA.2009.0307          |
| DOI: 10.1016/j.joen.2009.07.005         |
| DOI: 10.1016/j.cytogfr.2009.10.012      |
| DOI: 10.1089/scd.2009.0492              |
| DOI: 10.1177/0022034510364487           |
| DOI: 10.1111/j.1747-4477.2009.00188.x   |
| DOI: 10.1038/nature09347                |
| DOI: 10.1089/scd.2010.0353              |
| DOI: 10.1038/nature09531                |
| DOI: 10.1016/j.bbamcr.2011.01.022       |
| DOI: 10.1016/j.archoralbio.2011.02.006  |
| DOI: 10.1073/pnas.1100816108            |
| DOI: 10.1111/j.1749-6632.2011.06234.x   |
| DOI: 10.1016/j.molcel.2012.05.022       |
