# Supplementary material for: Characterization of proliferation, differentiation potential, and gene expression among clonal cultures of human dental pulp cells
Source: Hum Cell. 2020 Mar 16;33(3):490–501. doi: 10.1007/s13577-020-00327-9 (PMC7324427; doi:10.1007/s13577-020-00327-9)
Supplement: Supplementary file 4 — Supplementary file4 (PDF 18 kb) [file 13577_2020_327_MOESM4_ESM.pdf]

characterization of proliferation, differentiation potential, and gene expression among clonal cultures of human dental pulp cells

Tomoko Kobayashi<sup>1,2</sup>, Daisuke Torii<sup>3</sup>, Takanori Iwata<sup>2</sup>, Yuichi Izumi<sup>2,4</sup>, Masanori Nasu<sup>1</sup>, Takeo W. Tsutsui<sup>3</sup>

1 Research Center for Odontology, School of Life Dentistry at Tokyo, The Nippon Dental University

2 Department of Periodontology, Graduate School of Medical and Dental Sciences, Tokyo Medical and Dental University (TMDU)

3 Department of Pharmacology, School of Life Dentistry at Tokyo, The Nippon Dental University

4 Oral Care Perio Center, Southern TOHOKU General Hospital, Southern TOHOKU Research Institute for Neuroscience

Corresponding author: Takeo W. Tsutsui (ryuryu@tky.ndu.ac.jp)

**Supplemental Table S4.** DNA microarray data of 95 selected probesets related to multipotency and 'stemness or differentiation'.

Signal intensity values <100 are shaded in grey; values >1000 are represented in red letters. Ratios <0.67 are shaded in blue; ratios <0.83 are shaded in light blue. Ratios >1.5 are shaded in pink; ratios >1.2 are shaded in light pink.

| ProbeSet ID | Gene_Symbol | cl21_signal | cl4_signal | cl35_signal | cl29_signal | cl38_signal | ratio 21/29 | ratio 4/29 | ratio 35/29 | ratio 29/38 | ratio 4/38 | ratio 21/38 | ratio 35/38 | Location            | Type(s)                    |
|-------------|-------------|-------------|------------|-------------|-------------|-------------|-------------|------------|-------------|-------------|------------|-------------|-------------|---------------------|----------------------------|
| 8140650     | SEMA3E      | 24          | 48         | 68          | 244         | 263         | 0.1         | 0.2        | 0.3         | 0.9         | 0.2        | 0.1         | 0.3         | Extracellular Space | other                      |
| 7973974     | PAX9        | 587         | 610        | 130         | 1559        | 2090        | 0.4         | 0.4        | 0.1         | 0.7         | 0.3        | 0.3         | 0.1         | Nucleus             | transcription regulator    |
| 8140686     | SEMA3D      | 496         | 699        | 920         | 1634        | 2613        | 0.3         | 0.4        | 0.6         | 0.6         | 0.3        | 0.2         | 0.4         | Extracellular Space | other                      |
| 8091537     | IGSF10      | 34          | 50         | 43          | 74          | 189         | 0.5         | 0.7        | 0.6         | 0.4         | 0.3        | 0.2         | 0.2         | unknown             | other                      |
| 8046922     | COL3A1      | 2071        | 1648       | 2123        | 3354        | 4465        | 0.6         | 0.5        | 0.6         | 0.8         | 0.4        | 0.5         | 0.5         | Extracellular Space | other                      |
| 7961798     | SOX5        | 80          | 71         | 110         | 139         | 171         | 0.6         | 0.5        | 0.8         | 0.8         | 0.4        | 0.5         | 0.6         | Nucleus             | transcription regulator    |
| 7932254     | ITGA8       | 4644        | 4130       | 2372        | 5718        | 6662        | 0.8         | 0.7        | 0.4         | 0.9         | 0.6        | 0.7         | 0.4         | Plasma Membrane     | other                      |
| 8095545     | RUFY3       | 275         | 426        | 426         | 445         | 787         | 0.6         | 1.0        | 1.0         | 0.6         | 0.5        | 0.3         | 0.5         | Plasma Membrane     | other                      |
| 8139212     | GLI3        | 345         | 827        | 667         | 905         | 1056        | 0.4         | 0.9        | 0.7         | 0.9         | 0.8        | 0.3         | 0.6         | Nucleus             | transcription regulator    |
| 8138442     | TWIST1      | 545         | 885        | 738         | 1074        | 1185        | 0.5         | 0.8        | 0.7         | 0.9         | 0.7        | 0.5         | 0.6         | Nucleus             | transcription regulator    |
| 7973530     | PKC2        | 1058        | 774        | 608         | 1220        | 1253        | 0.9         | 0.6        | 0.5         | 1.0         | 0.6        | 0.8         | 0.5         | Cytoplasm           | kinase                     |
| 7943620     | ATM         | 505         | 568        | 623         | 640         | 845         | 0.8         | 0.9        | 1.0         | 0.8         | 0.7        | 0.6         | 0.7         | Nucleus             | kinase                     |
| 8076331     | TOB2        | 559         | 865        | 886         | 919         | 1062        | 0.6         | 0.9        | 1.0         | 0.9         | 0.8        | 0.5         | 0.8         | Nucleus             | other                      |
| 8145865     | GPR124      | 1269        | 1541       | 1335        | 1691        | 1842        | 0.8         | 0.9        | 0.8         | 0.9         | 0.8        | 0.7         | 0.7         | Plasma Membrane     | G-protein coupled receptor |
| 7935968     | LDB1        | 2160        | 2369       | 2599        | 2815        | 3151        | 0.8         | 0.8        | 0.9         | 0.9         | 0.8        | 0.7         | 0.8         | Nucleus             | transcription regulator    |
| 8042439     | ANTXR1      | 1588        | 1379       | 1784        | 1942        | 1950        | 0.8         | 0.7        | 0.9         | 1.0         | 0.7        | 0.8         | 0.9         | Plasma Membrane     | transmembrane receptor     |
| 8134263     | COL1A2      | 8190        | 8134       | 8960        | 8973        | 10817       | 0.9         | 0.9        | 1.0         | 0.8         | 0.8        | 0.8         | 0.8         | Extracellular Space | other                      |
| 8001306     | SIAH1       | 297         | 296        | 297         | 312         | 355         | 1.0         | 1.0        | 1.0         | 0.9         | 0.8        | 0.8         | 0.8         | Nucleus             | enzyme                     |
| 8109981     | FGF18       | 151         | 151        | 148         | 156         | 176         | 1.0         | 1.0        | 0.9         | 0.9         | 0.9        | 0.9         | 0.8         | Extracellular Space | growth factor              |
| 8160663     | AQP7        | 119         | 119        | 119         | 123         | 124         | 1.0         | 1.0        | 1.0         | 1.0         | 1.0        | 1.0         | 1.0         | Plasma Membrane     | transporter                |
| 8137979     | ACTB        | 10177       | 9947       | 9969        | 9842        | 9529        | 1.0         | 1.0        | 1.0         | 1.0         | 1.0        | 1.1         | 1.0         | Cytoplasm           | other                      |
| 7923027     | GLRX2       | 215         | 207        | 207         | 207         | 196         | 1.0         | 1.0        | 1.0         | 1.1         | 1.1        | 1.1         | 1.1         | Cytoplasm           | enzyme                     |
| 8050215     | YWHAQ       | 6519        | 6527       | 6327        | 6300        | 6039        | 1.0         | 1.0        | 1.0         | 1.0         | 1.1        | 1.1         | 1.0         | Cytoplasm           | other                      |
| 8109194     | SLC26A2     | 336         | 361        | 349         | 323         | 322         | 1.0         | 1.1        | 1.1         | 1.0         | 1.1        | 1.0         | 1.1         | Plasma Membrane     | transporter                |
| 8061136     | PTMA        | 11139       | 11215      | 11203       | 10603       | 10185       | 1.1         | 1.1        | 1.1         | 1.0         | 1.1        | 1.1         | 1.1         | Nucleus             | other                      |
| 7991332     | MESP1       | 280         | 280        | 293         | 279         | 254         | 1.0         | 1.0        | 1.0         | 1.1         | 1.1        | 1.1         | 1.2         | Nucleus             | transcription regulator    |
| 7947540     | TRAF6       | 532         | 448        | 449         | 442         | 432         | 1.2         | 1.0        | 1.0         | 1.0         | 1.0        | 1.2         | 1.0         | Cytoplasm           | enzyme                     |
| 7949067     | BAD         | 412         | 407        | 410         | 406         | 357         | 1.0         | 1.0        | 1.0         | 1.1         | 1.1        | 1.2         | 1.1         | Cytoplasm           | other                      |
| 7989888     | CLIC4       | 6959        | 7233       | 6547        | 6404        | 6162        | 1.1         | 1.1        | 1.0         | 1.0         | 1.2        | 1.1         | 1.1         | Plasma Membrane     | ion channel                |
| 7961022     | PTMA        | 4342        | 4899       | 4342        | 4131        | 4051        | 1.1         | 1.2        | 1.1         | 1.0         | 1.2        | 1.1         | 1.1         | Nucleus             | other                      |
| 7954006     | PTMA        | 4184        | 4693       | 4182        | 3977        | 3871        | 1.1         | 1.2        | 1.1         | 1.0         | 1.2        | 1.1         | 1.1         | Nucleus             | other                      |
| 7985993     | NGRN        | 618         | 593        | 586         | 545         | 532         | 1.1         | 1.1        | 1.1         | 1.0         | 1.1        | 1.2         | 1.1         | Nucleus             | other                      |
| 7936661     | PRDX3       | 1719        | 1878       | 1673        | 1588        | 1546        | 1.1         | 1.2        | 1.1         | 1.0         | 1.2        | 1.1         | 1.1         | Cytoplasm           | enzyme                     |
| 8166455     | PRDX4       | 935         | 879        | 853         | 841         | 758         | 1.1         | 1.0        | 1.0         | 1.1         | 1.2        | 1.2         | 1.1         | Cytoplasm           | enzyme                     |
| 8142468     | TPM3        | 5250        | 5175       | 5091        | 5080        | 4338        | 1.0         | 1.0        | 1.0         | 1.2         | 1.2        | 1.2         | 1.2         | Cytoplasm           | other                      |
| 8060850     | BMP2        | 131         | 154        | 131         | 131         | 116         | 1.0         | 1.2        | 1.0         | 1.1         | 1.3        | 1.1         | 1.1         | Extracellular Space | growth factor              |
| 8114158     | PPP2CA      | 2237        | 2253       | 2115        | 1985        | 1877        | 1.1         | 1.1        | 1.1         | 1.1         | 1.2        | 1.2         | 1.1         | Cytoplasm           | phosphatase                |
| 8040142     | CPSF3       | 629         | 577        | 515         | 514         | 489         | 1.2         | 1.1        | 1.0         | 1.1         | 1.2        | 1.3         | 1.1         | Nucleus             | enzyme                     |
| 7940530     | C11orf9     | 105         | 100        | 101         | 91          | 86          | 1.2         | 1.1        | 1.1         | 1.1         | 1.2        | 1.2         | 1.2         | Nucleus             | transcription regulator    |
| 8138189     | RPA3        | 164         | 158        | 145         | 144         | 128         | 1.1         | 1.1        | 1.0         | 1.1         | 1.2        | 1.3         | 1.1         | Nucleus             | other                      |
| 8027402     | CCNE1       | 155         | 138        | 134         | 122         | 120         | 1.3         | 1.1        | 1.1         | 1.0         | 1.2        | 1.3         | 1.1         | Nucleus             | transcription regulator    |
| 8018364     | GRB2        | 673         | 704        | 664         | 613         | 556         | 1.1         | 1.1        | 1.1         | 1.1         | 1.3        | 1.2         | 1.2         | Cytoplasm           | other                      |
| 8073733     | NUP50       | 166         | 155        | 155         | 144         | 126         | 1.2         | 1.1        | 1.1         | 1.1         | 1.2        | 1.3         | 1.2         | Nucleus             | transporter                |
| 8046461     | ZAK         | 1357        | 1190       | 1184        | 1063        | 1002        | 1.3         | 1.1        | 1.1         | 1.1         | 1.2        | 1.4         | 1.2         | Cytoplasm           | kinase                     |
| 7929988     | HPS6        | 266         | 276        | 243         | 233         | 204         | 1.1         | 1.2        | 1.0         | 1.1         | 1.4        | 1.3         | 1.2         | Cytoplasm           | other                      |
| 7913869     | STMN1       | 2413        | 2257       | 2159        | 1854        | 1822        | 1.3         | 1.2        | 1.2         | 1.0         | 1.2        | 1.3         | 1.2         | Cytoplasm           | other                      |
| 8146216     | VDAC3       | 3289        | 2880       | 2877        | 2719        | 2297        | 1.2         | 1.1        | 1.1         | 1.2         | 1.3        | 1.4         | 1.3         | Cytoplasm           | ion channel                |
| 8103922     | CASP3       | 460         | 416        | 437         | 380         | 322         | 1.2         | 1.1        | 1.2         | 1.2         | 1.3        | 1.4         | 1.4         | Cytoplasm           | peptidase                  |
| 8125941     | SRPK1       | 1063        | 1221       | 1174        | 1020        | 840         | 1.0         | 1.2        | 1.2         | 1.2         | 1.5        | 1.3         | 1.4         | Nucleus             | kinase                     |
| 8109120     | AFAP1L1     | 205         | 147        | 147         | 130         | 128         | 1.6         | 1.1        | 1.1         | 1.0         | 1.1        | 1.6         | 1.1         | unknown             | other                      |
| 8024557     | GNAI1       | 2647        | 2034       | 1883        | 1703        | 1660        | 1.6         | 1.2        | 1.1         | 1.0         | 1.2        | 1.6         | 1.1         | Plasma Membrane     | enzyme                     |
| 7920984     | CCT3        | 1554        | 1420       | 1577        | 1389        | 1060        | 1.1         | 1.0        | 1.1         | 1.3         | 1.3        | 1.5         | 1.5         | Cytoplasm           | other                      |
| 7912481     | MAD2L2      | 1110        | 854        | 853         | 828         | 656         | 1.3         | 1.0        | 1.0         | 1.3         | 1.3        | 1.7         | 1.3         | Nucleus             | enzyme                     |
| 8106730     | XRCC4       | 162         | 131        | 129         | 123         | 98          | 1.3         | 1.1        | 1.1         | 1.2         | 1.3        | 1.6         | 1.3         | Nucleus             | other                      |
| 8040070     | SOX11       | 388         | 440        | 438         | 354         | 294         | 1.1         | 1.2        | 1.2         | 1.2         | 1.5        | 1.3         | 1.5         | Nucleus             | transcription regulator    |
| 7927955     | KIAA1279    | 1348        | 973        | 932         | 839         | 787         | 1.6         | 1.2        | 1.1         | 1.1         | 1.2        | 1.7         | 1.2         | Cytoplasm           | enzyme                     |
| 8024566     |             | 2226        | 1871       | 1569        | 1468        | 1354        | 1.5         | 1.3        | 1.1         | 1.1         | 1.4        | 1.6         | 1.2         | #N/A                | #N/A                       |
| 8140398     | YWHAQ       | 2260        | 1840       | 2104        | 1729        | 1425        | 1.3         | 1.1        | 1.2         | 1.2         | 1.3        | 1.6         | 1.5         | Cytoplasm           | other                      |
| 8110090     | SFXN1       | 1687        | 1224       | 1248        | 1168        | 931         | 1.4         | 1.0        | 1.1         | 1.3         | 1.3        | 1.8         | 1.3         | Cytoplasm           | transporter                |
| 8064844     | PCNA        | 511         | 734        | 525         | 485         | 397         | 1.1         | 1.5        | 1.1         | 1.2         | 1.8        | 1.3         | 1.3         | Nucleus             | enzyme                     |
| 8172905     | HSD17B1     | 884         | 768        | 682         | 661         | 507         | 1.3         | 1.2        | 1.0         | 1.3         | 1.5        | 1.7         | 1.3         | Cytoplasm           | enzyme                     |
| 8079153     | ABHD5       | 758         | 913        | 733         | 660         | 526         | 1.1         | 1.4        | 1.1         | 1.3         | 1.7        | 1.4         | 1.4         | Cytoplasm           | enzyme                     |
| 8028719     | DLL3        | 116         | 107        | 114         | 95          | 71          | 1.2         | 1.1        | 1.2         | 1.3         | 1.5        | 1.6         | 1.6         | Extracellular Space | other                      |
| 7936734     | FGFR2       | 93          | 67         | 107         | 63          | 61          | 1.5         | 1.1        | 1.7         | 1.0         | 1.1        | 1.5         | 1.7         | Plasma Membrane     | kinase                     |
| 8018793     | JMJD6       | 641         | 468        | 516         | 397         | 360         | 1.6         | 1.2        | 1.3         | 1.1         | 1.3        | 1.8         | 1.4         | Plasma Membrane     | other                      |
| 8169640     | SLC25A5     | 4068        | 3118       | 3323        | 3076        | 2154        | 1.3         | 1.0        | 1.1         | 1.4         | 1.4        | 1.9         | 1.5         | Cytoplasm           | transporter                |
| 7947199     | LGR4        | 589         | 437        | 468         | 366         | 310         | 1.6         | 1.2        | 1.3         | 1.2         | 1.4        | 1.9         | 1.5         | Plasma Membrane     | G-protein coupled receptor |
| 8008517     | NME1        | 2166        | 1713       | 1779        | 1359        | 1174        | 1.6         | 1.3        | 1.3         | 1.2         | 1.5        | 1.8         | 1.5         | Nucleus             | kinase                     |
| 8041582     | PKDCC       | 210         | 284        | 185         | 157         | 137         | 1.3         | 1.8        | 1.2         | 1.1         | 2.1        | 1.5         | 1.4         | Cytoplasm           | kinase                     |
| 8093053     | TFR3        | 2351        | 1878       | 2067        | 1447        | 1267        | 1.6         | 1.3        | 1.4         | 1.1         | 1.5        | 1.9         | 1.6         | Plasma Membrane     | transporter                |
| 8148317     | MYC         | 1058        | 1160       | 890         | 824         | 584         | 1.3         | 1.4        | 1.1         | 1.4         | 2.0        | 1.8         | 1.5         | Nucleus             | transcription regulator    |
| 7975779     | FOS         | 236         | 303        | 173         | 152         | 146         | 1.6         | 2.0        | 1.1         | 1.0         | 2.1        | 1.6         | 1.2         | Nucleus             | transcription regulator    |
| 8020455     | GATA6       | 393         | 399        | 234         | 233         | 201         | 1.7         | 1.7        | 1.0         | 1.2         | 2.0        | 2.0         | 1.2         | Nucleus             | transcription regulator    |
| 8124848     | IER3        | 1137        | 1080       | 743         | 670         | 579         | 1.7         | 1.6        | 1.1         | 1.2         | 1.9        | 2.0         | 1.3         | Cytoplasm           | other                      |
| 8179704     | IER3        | 1137        | 1080       | 743         | 670         | 579         | 1.7         | 1.6        | 1.1         | 1.2         | 1.9        | 2.0         | 1.3         | Cytoplasm           | other                      |
| 7963880     | ITGA7       | 232         | 164        | 179         | 127         | 111         | 1.8         | 1.3        | 1.4         | 1.1         | 1.5        | 2.1         | 1.6         | Plasma Membrane     | other                      |
| 8023497     | ATP8B1      | 1714        | 2367       | 1636        | 1317        | 1068        | 1.3         | 1.8        | 1.2         | 1.2         | 2.2        | 1.6         | 1.5         | Plasma Membrane     | transporter                |
| 8178435     | IER3        |             |            |             |             |             |             |            |             |             |            |             |             |                     |                            |
